# Supplementary material
Source: PubMed Central journal article supplement (PMC9014498)
Supplement: ml1c00685_si_001.pdf [file ml1c00685_si_001.pdf]

Supporting information

**Selective A<sub>3</sub> Adenosine Receptor Antagonist Radioligand for Human and Rodent Species**

R. Rama Suresh<sup>1</sup>, Zhan-Guo Gao<sup>1</sup>, Veronica Salmaso<sup>1</sup>, Eric Chen<sup>1</sup>, Ryan G. Campbell<sup>1</sup>, Russell B. Poe<sup>2</sup>, Theodore E. Liston<sup>2</sup>, Kenneth A. Jacobson<sup>1\*</sup>

<sup>1</sup>Molecular Recognition Section, Laboratory of Bioorganic Chemistry, National Institute of Diabetes and Digestive and Kidney Diseases, Bethesda, MD 20892, USA.

<sup>2</sup>Astrocyte Pharmaceuticals, Cambridge, MA, USA 02142.

\* Address correspondence to: [kennethj@niddk.nih.gov](mailto:kennethj@niddk.nih.gov)

| <u>Contents</u>                                                    | <u>Page(s)</u> |
|--------------------------------------------------------------------|----------------|
| Synthetic methods                                                  | S2–S10         |
| A <sub>1</sub> AR binding of <b>16c</b> and <b>16d</b> (Figure S1) | S11            |
| Determination of radiochemical purity                              | S12            |
| Off-target screening (Table S1)                                    | S13            |
| Pharmacokinetics of <b>9</b> (Tables S2 and S3, Figure S2)         | S14–S16        |
| Other thiazole-2-amines in the literature (Table S4)               | S17–S18        |
| Molecular modeling methods                                         | S19–S21        |
| References                                                         | S22–S23        |
| Representative NMR and mass spectra                                | S24–S30        |

### Chemical Synthesis:

The routes to the new antagonist analogues are shown in the main text (Schemes 1 and 2). 3,5-Dimethylbenzoyl chloride (**11a**), and 4-methylpyridine were purchased from AK Scientific, Inc. (Union City, CA). Other reagents and solvents were purchased from Sigma-Aldrich (St. Louis, MO). <sup>1</sup>H-NMR spectra were obtained with a Bruker 400 spectrometer using CDCl<sub>3</sub>, DMSO-d<sub>6</sub>, acetone-d<sub>6</sub> or a few drops of MeOH-d<sub>4</sub> in CDCl<sub>3</sub> as a solvent. The chemical shifts are expressed as ppm, and the coupling constants (*J*) are given in Hz. The purity of final compounds was checked using an Agilent 1260 Infinity HPLC equipped with an Agilent Eclipse 5 μm XDB-C18 analytical column (250 mm × 4.6 mm; Agilent Technologies Inc., Palo Alto, CA). Mobile phase: linear gradient solvent system, 10 mM TEAA (triethyl ammonium acetate):CH<sub>3</sub>CN from 95:5 to 0:100 in 20 min; the flow rate was 1.0 mL/min. Peaks were detected by UV absorption with a diode array detector at 230, 254, and 280 nm. All derivatives tested for biological activity showed >95 % purity in the HPLC systems.

The previous synthesis of **9** and analogues was reported in Miwatashi et al.<sup>1</sup>

### *N*-(4-(3,5-Dimethylphenyl)-5-(pyridin-4-yl)thiazol-2-yl)nicotinamide [DPTN, **9**]:<sup>1</sup>

Nicotinoyl chloride hydrochloride (55 mg, 0.293 mmol, 1.5 eq.) was added to a solution of **15a** (55 mg, 0.195 mmol, 1.0 eq.) and 4-dimethylaminopyridine (DMAP) (7.15 mg, 0.0585 mmol, 0.3 eq.) in NMP (2 mL), and the resulting mixture was stirred at 80 °C for 16 h. Half sat. NaHCO<sub>3</sub> solution (10 mL) was added to the reaction mixture and extracted with ethyl acetate (3x 20 mL). The combined EtOAc layer was dried over Na<sub>2</sub>SO<sub>4</sub> and filtered. The filtrate was concentrated by rotary evaporation to obtain the crude product, which was purified by silica column to obtain a pale yellow solid. Eluant: 80–85 % EtOAc in hexane. TLC: R<sub>f</sub> ~ 0.3 in EtOAc. Yield: 43 mg (57%). Spectroscopic data were in agreement with the literature report.<sup>1</sup>

<sup>1</sup>H NMR (400 MHz, DMSO-d<sub>6</sub>) δ 13.20 (s, 1H), 9.25 (d, *J* = 2.3 Hz, 1H), 8.84 – 8.78 (m, 1H), 8.53 (d, *J* = 5.3 Hz, 2H), 8.46 (d, *J* = 8.0 Hz, 1H), 7.61 (dd, *J* = 8.0, 4.8 Hz, 1H), 7.31 (d, *J* = 6.1 Hz, 2H), 7.09 (s, 2H), 7.02 (s, 1H), 2.23 (s, 6H).

HRMS (ESI) *m/z*: [M+H]<sup>+</sup> calculated for C<sub>22</sub>H<sub>19</sub>N<sub>4</sub>O<sup>32</sup>S: 378.1280; found 378.1279.

### 3-Fluoro-5-methylbenzoyl chloride (**11b**):

Compound **11b** was prepared by a method similar to that used for **11c**, from 3-fluoro-5-methylbenzoic acid **10b** (2.00 g, 13.0 mmol, 1.0 eq.) and thionyl chloride (2.82 mL, 38.9 mmol, 3.0 eq.) in dry toluene (~0.4 M). Yield: 89%, 2.00 g.

### 3-Bromo-5-methylbenzoyl chloride (**11c**):

To a stirred suspension of 3-bromo-5-methylbenzoic acid **10c** (3.00 g, 14.0 mmol, 1.0 eq.) in dry toluene (35 mL) at 0 °C, a solution of oxalyl chloride solution (2.5 M in DCM, 16 mL, 30.7 mmol, 2.2 eq.) was added dropwise via syringe at 0 °C, followed by the addition of 25 μL of DMF. The ice bath was removed, and the reaction mixture was stirred at room temperature for 16 h. The solvent was removed by rotary evaporation to obtain the product as an oily residue **11c**. This was carried over to the next step without any further purification. Yield: 3.14 g (96%).

Compounds **11b** and **11d** were prepared by this method with slight modifications.

### **3-Iodo-5-methylbenzoyl chloride (11d):**

Compound **11d** was prepared by a method similar to that used for **11c**, from 3-iodo-5-methylbenzoic acid **10d** (1.00 g, 3.82 mmol, 1.0 eq.) and oxalyl chloride solution (2.5 M in DCM, 3.01 mL, 7.63 mmol, 2.0 eq.) in dry toluene (~0.25 M). Yield: 93%, 1.00 g.

### *Synthesis of Weinreb-Nahm amides (12a-d):*

#### ***N*-Methoxy-*N*-3,5-trimethylbenzamide (12a):<sup>1</sup>**

To a stirred solution of *N,O*-dimethylhydroxylamine hydrochloride (5.36 g, 55 mmol, 1.1 eq.) and K<sub>2</sub>CO<sub>3</sub> (100 mmol, 2.0 eq.) in a mixture of EtOAc (250 mL) and water (125 mL), a solution of 3,5-dimethylbenzoyl chloride (8.43 g, 50 mmol, 1.0 eq.) in EtOAc (20 mL) was added dropwise at 0 °C. The ice bath was removed, and the reaction mixture was stirred at room temperature for 18 h. The EtOAc layer was separated, and the aqueous phase was washed with ethyl acetate (2x100 mL). The combined EtOAc layer was dried over Na<sub>2</sub>SO<sub>4</sub> and filtered. The filtrate was concentrated by rotary evaporation to obtain an oily residue. This crude product was carried over to the next step without any further purification. Yield: 9.50 g (98%); TLC: R<sub>f</sub> ~ 0.5 in 50% EtOAc in hexane.

#### **3-Fluoro-*N*-methoxy-*N*,5-dimethylbenzamide (12b):**

To a stirred solution of *N,O*-dimethylhydroxylamine hydrochloride (1.30 g, 13.2 mmol, 1.2 eq.) and K<sub>2</sub>CO<sub>3</sub> (3.80 g, 27.5 mmol, 2.5 eq.) in a mixture of EtOAc (40 mL) and water (20 mL), a solution of 3-bromo-5-methylbenzoyl chloride (1.90 g, 11.00 mmol, 1.0 eq.) in EtOAc (5 mL) was added dropwise at 0°C. The ice bath was removed, and the reaction mixture was stirred at room temperature for 18 h. The EtOAc layer was separated, and the aqueous phase was washed with ethyl acetate (2x30 mL). The combined EtOAc layer was dried over Na<sub>2</sub>SO<sub>4</sub> and filtered. The filtrate was concentrated by rotary evaporation to obtain an oily residue. This was carried over to the next step without any further purification. TLC: R<sub>f</sub> ~ 0.5 in 33% EtOAc in hexane. Yield: 2.00 g (92%).

<sup>1</sup>H NMR (400 MHz, CDCl<sub>3</sub>) δ 7.27 (s, 1H), 7.21 – 7.14 (m, 1H), 6.97 (dt, *J* = 9.3, 2.1 Hz, 1H), 3.56 (d, *J* = 1.9 Hz, 3H), 3.35 (s, 3H), 2.38 (s, 3H). <sup>19</sup>F NMR (377 MHz, CDCl<sub>3</sub>) δ -113.98.

LCMS (ESI) *m/z*: [M+H]<sup>+</sup> calculated for C<sub>10</sub>H<sub>13</sub>NO<sub>2</sub>F: 197.09; found 198.1.

#### **3-Bromo-*N*-methoxy-*N*,5dimethylbenzamide (12c):**

To a stirred solution of *N,O*-dimethylhydroxylamine hydrochloride (0.922 g, 9.42 mmol, 1.1 eq.) and K<sub>2</sub>CO<sub>3</sub> (2.37 g, 17.1 mmol, 2.0 eq.) in a mixture of EtOAc (40 mL) and water (20 mL), a solution of 3-bromo-5-methylbenzoyl chloride **11c** (2.00 g, 8.57 mmol, 1.0 eq.) in EtOAc (5 mL) was added dropwise at 0°C. The ice bath was removed, and the reaction mixture was stirred at room temperature for 18 h. The EtOAc layer was separated, and the aqueous phase was washed with ethyl acetate (2x20 mL). The combined EtOAc layer was dried over Na<sub>2</sub>SO<sub>4</sub> and filtered. The

filtrate was concentrated by rotary evaporation to obtain an oily residue. This was carried over to the next step without any further purification. TLC:  $R_f \sim 0.75$  in EtOAc. Yield: 1.92 g (87%).

$^1\text{H NMR}$  (400 MHz,  $\text{CDCl}_3$ )  $\delta$  7.59 (d,  $J = 1.8$  Hz, 1H), 7.43 – 7.37 (m, 2H), 3.55 (s, 3H), 3.34 (s, 3H), 2.35 (s, 3H).

HRMS (ESI)  $m/z$ :  $[\text{M}+\text{H}]^+$  calculated for  $\text{C}_{10}\text{H}_{13}\text{NO}_2^{79}\text{Br}$ : 258.0130; found 258.0126.

### **3-Iodo-*N*-methoxy-*N*,5-dimethylbenzamide (12d):**

To a stirred solution of *N,O*-dimethylhydroxylamine hydrochloride (0.411 g, 4.20 mmol, 1.1 eq.) and  $\text{K}_2\text{CO}_3$  (1.06 g, 7.64 mmol, 2.0 eq.) in a mixture of EtOAc (20 mL) and water (10 mL), a solution of 3-iodo-5-methylbenzoyl chloride (1.07 g, 3.82 mmol, 1.0 eq.) in EtOAc (5 mL) was added dropwise via syringe at  $0^\circ\text{C}$ . The ice bath was removed, and the reaction mixture was stirred at room temperature for 16 h. The EtOAc layer was separated, and the aqueous phase was washed with ethyl acetate (2x20 mL). The combined EtOAc layer was dried over  $\text{Na}_2\text{SO}_4$  and filtered. The filtrate was concentrated by rotary evaporation to obtain an oily residue. This was carried over to the next step without any further purification. TLC:  $R_f \sim 0.75$  in EtOAc. Yield: 1.00 g (86%).

$^1\text{H NMR}$  (400 MHz,  $\text{CDCl}_3$ )  $\delta$  7.78 (s, 1H), 7.64 – 7.59 (m, 1H), 7.41 (s, 1H), 3.55 (s, 3H), 3.33 (s, 3H), 2.33 (s, 3H).

HRMS (ESI)  $m/z$ :  $[\text{M}+\text{H}]^+$  calculated for  $\text{C}_{10}\text{H}_{13}\text{NO}_2\text{I}$ : 305.9991; found 305.9988.

### *Synthesis of Weinreb–Nahm ketones (13a-d):*

#### **1-(3,5-Dimethylphenyl)-2-(pyridin-4-yl)ethan-1-one (13a):<sup>1</sup>**

To a solution of LDA (1.0 M in THF/hexane, 50 mL, 50 mmol, 4.0 eq.) in dry THF (30 mL) at  $-78^\circ\text{C}$  (dry ice in acetone), a solution of 4-picoline (2.43 mL, 25 mmol, 2.0 eq.) in dry THF (15 mL) was added dropwise at  $-78^\circ\text{C}$ . The reaction mixture was stirred at  $-78$  to  $-50^\circ\text{C}$  for 2 h. To this mixture, a solution of **12a** (2.42 g, 12.5 mmol, 1.0 eq.) in dry THF (20 mL) was added dropwise at  $-78^\circ\text{C}$  via cannula. The ice bath was removed, and the reaction mixture was stirred at room temperature for 12 h. The reaction mixture was quenched by the addition of sat.  $\text{NH}_4\text{Cl}$  (20 mL) at 0 to  $5^\circ\text{C}$  and diluted with water (50 mL). The phases were separated, and the aqueous phase was extracted with EtOAc (3x 60 mL). The combined EtOAc layer was dried over  $\text{Na}_2\text{SO}_4$  and filtered. The filtrate was concentrated by rotary evaporation to obtain an oily residue, which was purified by silica column to obtain a pale yellow solid. Eluant: 30-50% EtOAc in hexane. Yield: 1.41 g (50%).

#### **1-(3-Fluoro-5-methylphenyl)-2-(pyridin-4-yl)ethan-1-one (13b):**

To a solution of LDA (1.0 M in THF/hexane, 11 mL, 1.05 eq.) in dry THF (30 mL) at  $-78^\circ\text{C}$  (dry ice in acetone), a solution of 4-picoline (1.48 mL, 15.2 mmol, 1.5 eq.) was added dropwise via syringe at  $-78^\circ\text{C}$ . The reaction mixture was stirred at  $-78^\circ\text{C}$  for 45 min. To this mixture, a solution of amide **12b** (2.0 g, 10.14 mmol, 1.0 eq.) in dry THF (6 mL) was added dropwise at  $-78^\circ\text{C}$  via

syringe and stirring continued at -78 °C for 3 h. The reaction mixture was quenched by the addition of sat. NH<sub>4</sub>Cl (10 mL) at 0 to 5 °C and diluted with water (20 mL). The phases were separated, and the aqueous phase was extracted with EtOAc (3x 30 mL). The combined EtOAc layer was dried over Na<sub>2</sub>SO<sub>4</sub> and filtered. The filtrate was concentrated by rotary evaporation to obtain an oily residue, which was purified by silica column to obtain a pale yellow solid. Eluant: 40–60% EtOAc in hexane. Yield: 1.65 g (71%).

<sup>1</sup>H NMR (400 MHz, CDCl<sub>3</sub>) δ 8.60 – 8.54 (m, 2H), 7.58 (s, 1H), 7.46 (d, J = 9.1 Hz, 1H), 7.22 – 7.16 (m, 2H), 7.12 (d, J = 9.1 Hz, 1H), 4.25 (s, 2H), 2.42 (s, 3H).

<sup>19</sup>F NMR (377 MHz, CDCl<sub>3</sub>) δ -112.46 (t, J = 9.1 Hz).

HRMS (ESI) m/z: [M+H]<sup>+</sup> calculated for C<sub>14</sub>H<sub>13</sub>NOF: 230.0981; found 230.0978.

**1-(3-Bromo-5-methylphenyl)-2-(pyridin-4-yl)ethan-1-one (13c):**

To a solution of LDA (1.0 M in THF/hexane, 4.30 mL, 1.05 eq.) in dry THF (15 mL) at -78 °C (dry ice in acetone), a solution of 4-picoline (0.60 mL, 6.102 mmol, 1.5 eq.) in dry THF (15 mL) was added dropwise at -78 °C. The reaction mixture was stirred at -78 °C for 45 min. To this mixture, a solution of amide **12c** (1.05 g, 4.068 mmol, 1.0 eq.) in dry THF (10 mL) was added dropwise at -78 °C via syringe and stirring continued at -78 °C for 3 h. The reaction mixture was quenched by the addition of sat. NH<sub>4</sub>Cl (10 mL) at 0 to 5 °C and diluted with water (20 mL). The phases were separated, and the aqueous phase was extracted with EtOAc (3x 60 mL). The combined EtOAc layer was dried over Na<sub>2</sub>SO<sub>4</sub> and filtered. The filtrate was concentrated by rotary evaporation to obtain an oily residue, which was purified by silica column to obtain a pale yellow solid. Eluant: 30–50% EtOAc in hexane. Yield: 0.71 g (60%).

<sup>1</sup>H NMR (400 MHz, CDCl<sub>3</sub>) δ 8.57 (d, J = 6.1 Hz, 1H), 7.91 (s, 1H), 7.71 (s, 1H), 7.56 (s, 1H), 7.18 (d, J = 6.0 Hz, 1H), 4.24 (s, 2H), 2.40 (s, 3H).

HRMS (ESI) m/z: [M+H]<sup>+</sup> calculated for C<sub>14</sub>H<sub>13</sub>NO<sup>79</sup>Br: 290.0181; found 290.0181.

**1-(3-Iodo-5-methylphenyl)-2-(pyridin-4-yl)ethan-1-one (13d):**

To a solution of LDA (1.0 M in THF/hexane, 3.28 mL, 1.00 eq.) in dry THF (20 mL) at -78 °C (dry ice in acetone), a solution of 4-picoline (479 μL, 4.92 mmol, 1.5 eq.) was added dropwise via syringe at -78 °C. The reaction mixture was stirred at -78 °C for 45 min. To this mixture, a solution of amide **12d** (1.00 g, 3.28 mmol, 1.0 eq.) in dry THF (10 mL) was added dropwise at -78 °C via syringe and stirring continued at -78 °C for 3 h. The reaction mixture was quenched by the addition of sat. NH<sub>4</sub>Cl (10 mL) at 0 to 5 °C and diluted with water (20 mL). The phases were separated, and the aqueous phase was extracted with EtOAc (3x 30 mL). The combined EtOAc layer was dried over Na<sub>2</sub>SO<sub>4</sub> and filtered. The filtrate was concentrated by rotary evaporation to obtain an oily residue, which was purified by silica column to obtain a pale yellow solid. Eluant: 40–60% EtOAc in hexane. Yield: 0.64 g (58%).

<sup>1</sup>H NMR (400 MHz, CDCl<sub>3</sub>) δ 8.71 – 8.41 (m, 2H), 8.11 (s, 1H), 7.75 (d, J = 13.2 Hz, 2H), 7.18 (d, J = 6.1 Hz, 2H), 4.23 (s, 2H), 2.38 (s, 3H).

HRMS (ESI)  $m/z$ :  $[M+H]^+$  calculated for  $C_{14}H_{13}NOI$ : 338.0042; found 338.0041.

**General procedure for the synthesis of compounds 14a-d:**

**2-Bromo-1-(3,5-dimethylphenyl)-2-(pyridin-4-yl)ethan-1-one hydrobromide (14a):<sup>1</sup>**

To a stirred solution of **13a** (0.66 g, 2.93 mmol, 1.0 eq.) in acetic acid (3 mL), bromine (150  $\mu$ L, 2.93 mmol, 1.0 eq.) was added dropwise *via* micro syringe at room temperature. The reaction mixture was stirred for 4 h at 80 °C. A yellow ppt was formed after 4 h. The solvent was removed by rotary evaporation and the residue was washed with ethyl acetate (3x3 mL), filtered and dried to afford compound **14a** as a pale yellow crystalline powder. Yield: 0.592 g (52%).

**2-Bromo-1-(3-fluoro-5-methylphenyl)-2-(pyridin-4-yl)ethan-1-one (14b):**

To a stirred solution of **13b** (0.325 g, 1.42 mmol, 1.0 eq.) in acetic acid (3 mL), bromine (110  $\mu$ L, 2.13 mmol, 1.5 eq.) was added dropwise *via* micro syringe at room temperature. The reaction mixture was stirred for 3 h at 80 °C. The solvent was removed by rotary evaporation and the residue was washed with ethyl acetate (10 mL), diethyl ether (20 mL), filtered and dried to afford compound **14b** as a solid in orange color. Yield: 0.24 g (43%).

<sup>1</sup>H NMR (400 MHz, DMSO)  $\delta$  8.87 (d,  $J$  = 5.7 Hz, 2H), 8.01 (d,  $J$  = 5.7 Hz, 2H), 7.80 (s, 1H), 7.74 (d,  $J$  = 9.5 Hz, 1H), 7.45 (d,  $J$  = 9.4 Hz, 1H), 7.23 (s, 1H), 2.42 (s, 3H). <sup>19</sup>F NMR (377 MHz, DMSO- $d_6$ )  $\delta$  -112.80.

HRMS (ESI)  $m/z$ :  $[M+H]^+$  calculated for  $C_{14}H_{12}NOF^{79}Br$ : 308.009; found 0308.0086.

**2-Bromo-1-(3-bromo-5-methylphenyl)-2-(pyridin-4-yl)ethan-1-one (14c):**

To a stirred solution of **13c** (0.615 g, 2.12 mmol, 1.0 eq.) in acetic acid (4 mL), bromine (109  $\mu$ L, 2.12 mmol, 1.0 eq.) was added dropwise *via* micro syringe at room temperature. The reaction mixture was stirred for 4 h at 80 °C. A yellow ppt was formed after 3 h. The solvent was removed by rotary evaporation and the residue was washed with ethyl acetate (10 mL), diethyl ether (20 mL), filtered and dried to afford the compound **14c** as a pale yellow crystalline powder. Yield: 0.82 g (86%).

<sup>1</sup>H NMR (400 MHz, DMSO- $d_6$ )  $\delta$  8.91 (d,  $J$  = 6.3 Hz, 2H), 8.10 (d,  $J$  = 5.4 Hz, 2H), 7.93 (s, 2H), 7.79 (s, 1H), 7.28 (s, 1H), 2.41 (s, 3H).

HRMS (ESI)  $m/z$ :  $[M+H]^+$  calculated for  $C_{14}H_{12}NO^{79}BrI$ : 415.9147; found 415.9152.

**2-Bromo-1-(3-iodo-5-methylphenyl)-2-(pyridin-4-yl)ethan-1-one (14d):**

To a stirred solution of **13d** (0.420 g, 1.25 mmol, 1.0 eq.) in acetic acid (3 mL), bromine (64  $\mu$ L, 1.246 mmol, 1.0 eq.) was added dropwise *via* micro syringe at room temperature. The reaction mixture was stirred for 3 h at 80 °C. The solvent was removed by rotary evaporation and the residue

was washed with ethyl acetate (10 mL), diethyl ether (20 mL), filtered and dried to afford the compound **14d** as a pale yellow solid. Yield: 0.56 g (90%).

$^1\text{H}$  NMR (400 MHz, DMSO- $d_6$ )  $\delta$  8.94 (d,  $J$  = 4.2 Hz, 2H), 8.25 (s, 1H), 8.17 – 8.10 (m, 2H), 7.95 (dd,  $J$  = 4.7, 2.7 Hz, 2H), 7.28 (s, 1H), 2.37 (s, 2H).

HRMS (ESI)  $m/z$ :  $[\text{M}+\text{H}]^+$  calculated for  $\text{C}_{14}\text{H}_{12}\text{NO}^{79}\text{BrI}$ : 415.9147; found 415.9152.

### Compounds 15a-d:

#### 4-(3,5-Dimethylphenyl)-5-(pyridin-4-yl)thiazol-2-amine (**15a**):<sup>1</sup>

Methylthiourea (0.119 g, 1.57 mmol, 1.1 eq.) was added to a mixture of **14a** (0.544 g, 1.49 mmol, 1.0 eq.) and triethylamine (436  $\mu\text{L}$ , 3.13 mmol, 2.1 eq.) in acetonitrile (6 mL). The resulting solution was refluxed for 3 h. The solvent was removed by rotary evaporation and half sat.  $\text{NaHCO}_3$  solution (5 mL) was added to the residue. The precipitate was collected by filtration, and the resulting solid was washed with water and ether successively to afford **15a** as a pale yellow powder. Yield: 0.270 g (64%).

#### 4-(3-Fluoro-5-methylphenyl)-5-(pyridin-4-yl)thiazol-2-amine (**15b**):

Methylthiourea (12 mg, 0.155 mmol, 1.5 eq.) was added to a mixture of **14b** (40 mg, 0.103 mmol, 1.0 eq.) and triethylamine (43  $\mu\text{L}$ , 0.310 mmol, 3.0 eq.) in acetonitrile (2 mL). The resulting solution was refluxed for 3h in a sealed tube. The reaction mixture was cooled to the room temperature and diluted with EtOAc (10 mL). Then, the crude mixture was washed with half sat.  $\text{NaHCO}_3$  solution (5 mL) and separated the layers. The aqueous phase was washed with EtOAc (2x10 mL) and the combined EtOAc layer was dried over  $\text{Na}_2\text{SO}_4$  and filtered. The filtrate was concentrated by rotary evaporation to obtain the crude product, which was purified by silica column to obtain a pale yellow solid. Yield: 22 mg (76%).

$^1\text{H}$  NMR (400 MHz, a few drops of MeOH- $d_4$  in  $\text{CDCl}_3$ )  $\delta$  8.47 (d,  $J$  = 5.3 Hz, 2H), 7.65 (s, 1H), 7.54 (d,  $J$  = 8.5 Hz, 1H), 7.41 (d,  $J$  = 5.2 Hz, 2H), 6.96 (d,  $J$  = 9.3 Hz, 1H), 2.31 (s, 3H).  $^{19}\text{F}$  NMR (377 MHz)  $\delta$  -114.61.

HRMS (ESI)  $m/z$ :  $[\text{M}+\text{H}]^+$  calculated for  $\text{C}_{15}\text{H}_{13}\text{N}_3\text{F}^{32}\text{S}$ : 286.0814; found 286.0811.

#### 4-(3-Bromo-5-methylphenyl)-5-(pyridin-4-yl)thiazol-2-amine (**15c**):

Methylthiourea (0.13 g, 1.71 mmol, 1.1 eq.) was added to a mixture of **14c** (0.70 g, 1.56 mmol, 1.0 eq.) and triethylamine (652  $\mu\text{L}$ , 4.68 mmol, 3.0 eq.) in acetonitrile (10 mL). The resulting solution was refluxed for 3 h. The solvent was removed by rotary evaporation, and half sat.  $\text{NaHCO}_3$  solution (15 mL) was added to the residue. The reaction mixture was extracted with ethyl acetate (3x30 mL). The combined EtOAc layer was dried over  $\text{Na}_2\text{SO}_4$  and filtered. The filtrate was concentrated by rotary evaporation to obtain the crude product, which was purified by silica column to obtain a pale yellow solid. Yield: 0.43 g (80%). TLC:  $R_f$  ~ 0.25 in hexane-EtOAc (1:1).

$^1\text{H}$  NMR (400 MHz, DMSO- $d_6$ )  $\delta$  8.47 (d,  $J$  = 6.5 Hz, 1H), 7.73 (s, 2H), 7.43 (s, 1H), 7.28 – 7.22 (m, 3H), 2.26 (s, 3H).

HRMS (ESI)  $m/z$ :  $[\text{M}+\text{H}]^+$  calculated for  $\text{C}_{15}\text{H}_{13}\text{N}_3^{79}\text{Br}^{32}\text{S}$ : 346.0014; found 346.0010.

**4-(3-Iodo-5-methylphenyl)-5-(pyridin-4-yl)thiazol-2-amine (15d):**

Methylthiourea (62 mg, 0.818 mmol, 1.2 eq.) was added to a mixture of **15c** (339 mg, 0.682 mmol, 1.0 eq.) and triethylamine (285  $\mu\text{L}$ , 2.05 mmol, 3.0 eq.) in acetonitrile (10 ml). The resulting solution was refluxed for 4 h. The solvent was removed by rotary evaporation, and half sat.  $\text{NaHCO}_3$  solution (15 mL) was added to the residue. The reaction mixture was extracted with ethyl acetate (3x30 mL). The combined EtOAc layer was dried over  $\text{Na}_2\text{SO}_4$  and filtered. The filtrate was concentrated by rotary evaporation to obtain the crude product, which was purified by silica column to obtain a pale yellow solid. Yield: 102 mg (38%). TLC:  $R_f$  ~ 0.3 in 33% Acetone in hexane (1:2).

$^1\text{H}$  NMR (400 MHz, Acetone- $d_6$ )  $\delta$  8.54 (d,  $J$  = 6.1 Hz, 2H), 8.31 (s, 1H), 7.95 (s, 1H), 7.73 (s, 1H), 7.49 (d,  $J$  = 6.1 Hz, 2H), 4.56 (s, 2H), 2.33 (s, 3H).

HRMS (ESI)  $m/z$ :  $[\text{M}+\text{H}]^+$  calculated for  $\text{C}_{15}\text{H}_{13}\text{N}_3^{32}\text{SI}$ : 393.9875; found 393.9877.

**Compounds 16b-d and 17:**

***N*-(4-(3-Fluoro-5-methylphenyl)-5-(pyridin-4-yl)thiazol-2-yl)nicotinamide (16b):**

Nicotinoyl chloride hydrochloride (37 mg, 0.210 mmol, 3.0 eq.) was added to a solution of **15b** (20 mg, 0.0701 mmol, 1.0 eq.) and 4-dimethylaminopyridine (DMAP) (9 mg, 0.0585 mmol, 0.0701 mmol, 1.0 eq.) in DMA (2 mL), and the resulting mixture was stirred at 80 °C for 16 h. Half sat.  $\text{NaHCO}_3$  solution (10 mL) was added to the reaction mixture and the mixture extracted with ethyl acetate (3x 15 mL). The combined EtOAc layer was dried over  $\text{Na}_2\text{SO}_4$  and filtered. The filtrate was concentrated by rotary evaporation to obtain the crude product, which was purified by silica column to obtain a pale yellow solid. Eluant: 40–50% acetone in hexane. TLC:  $R_f$  ~ 0.3 in 66 % EtOAc in hexane (2:1). Yield: 16 mg (59%).

$^1\text{H}$  NMR (400 MHz, acetone- $d_6$ )  $\delta$  9.37 (s, 1H), 8.85 (d,  $J$  = 4.2 Hz, 1H), 8.63 – 8.51 (m, 3H), 7.62 (dd,  $J$  = 8.0, 4.8 Hz, 1H), 7.36 (d,  $J$  = 6.2 Hz, 2H), 7.17 (s, 1H), 7.00 (dd,  $J$  = 16.1, 9.9 Hz, 2H), 2.31 (s, 3H). On the spectrum, peaks at 3.00, 2.83, and 1.97 ppm were from DMA solvent traces.

HRMS (ESI)  $m/z$ :  $[\text{M}+\text{H}]^+$  calculated for  $\text{C}_{21}\text{H}_{16}\text{N}_4\text{O}^{32}\text{SF}$ : 391.1029; found 391.1031.

***N*-(4-(3-Bromo-5-methylphenyl)-5-(pyridin-4-yl)thiazol-2-yl)nicotinamide (16c):**

Nicotinoyl chloride hydrochloride (121 mg, 0.679 mmol, 5.0 eq.) was added to a solution of **15c** (47 mg, 0.136 mmol, 1.0 eq.) and 4-dimethylaminopyridine (DMAP) (66 mg, 0.272 mmol, 2.0 eq.) in NMP (2 mL), and the resulting mixture was stirred at 80 °C for 20 h. Half sat.  $\text{NaHCO}_3$



solution (10 mL) was added to the reaction mixture slowly at RT and the mixture extracted with ethyl acetate (3x 20 mL). Extracts were washed with brine, dried and concentrated to give a solid. The combined EtOAc layer was dried over Na<sub>2</sub>SO<sub>4</sub> and filtered. The filtrate was concentrated by rotary evaporation to obtain the crude product, which was purified by silica column to obtain a pale yellow solid. Eluant: 70-80% EtOAc in hexane. TLC: R<sub>f</sub> ~ 0.4 in 66 % EtOAc in hexane (2:1). Yield: 53 mg (87%).

<sup>1</sup>H NMR (400 MHz, a few drops of MeOH-d<sub>4</sub> in CDCl<sub>3</sub>) δ 9.16 (d, *J* = 2.3 Hz, 1H), 8.74 (dd, *J* = 4.9, 1.6 Hz, 1H), 8.48 – 8.42 (m, 2H), 8.34 (dt, *J* = 8.1, 2.0 Hz, 1H), 7.49 (dd, *J* = 8.0, 4.9 Hz, 1H), 7.39 (d, *J* = 1.9 Hz, 1H), 7.28 – 7.16 (m, 3H), 7.12 (s, 1H), 2.23 (s, 3H).

HRMS (ESI) *m/z*: [M+H]<sup>+</sup> calculated for C<sub>21</sub>H<sub>16</sub>N<sub>4</sub>O<sup>79</sup>Br<sup>32</sup>S: 451.0228; found 451.0235.

***N*-(4-(3-Iodo-5-methylphenyl)-5-(pyridin-4-yl)thiazol-2-yl)nicotinamide (16d):**

Nicotinoyl chloride hydrochloride (84 mg, 0.473 mmol, 3.0 eq.) was added to a solution of **15d** (62 mg, 0.158 mmol, 1.0 eq.) and 4-dimethylaminopyridine (DMAP) (19 mg, 0.158 mmol, 1.0 eq.) in DMA (2 mL), and the resulting mixture was stirred at 80 °C for 20 h. Half sat. NaHCO<sub>3</sub> solution (10 mL) was added to the reaction mixture slowly at RT and the mixture extracted with ethyl acetate (3x 20 mL). The combined EtOAc layer was dried over Na<sub>2</sub>SO<sub>4</sub> and filtered. The filtrate was concentrated by rotary evaporation to obtain the crude product, which was purified by silica column to obtain a pale yellow solid. Eluant: 65–80% EtOAc in hexane. TLC: R<sub>f</sub> ~ 0.4 in 66 % EtOAc in hexane (2:1). Yield: 50 mg (39%).

<sup>1</sup>H NMR (400 MHz, a few drops of MeOH-d<sub>4</sub> in CDCl<sub>3</sub>) δ 9.27 – 9.07 (m, 1H), 8.85 – 8.70 (m, 1H), 8.49 (s, 2H), 8.33 (dt, *J* = 8.1, 2.0 Hz, 1H), 7.62 (s, 1H), 7.55 – 7.44 (m, 2H), 7.24 (d, *J* = 5.1 Hz, 2H), 7.16 (s, 1H), 2.22 (s, 3H).

HRMS (ESI) *m/z*: [M+H]<sup>+</sup> calculated for C<sub>21</sub>H<sub>16</sub>N<sub>4</sub>OI<sup>32</sup>S: 499.0089; found 499.0092.

**5-Bromo-*N*-(4-(3,5-dimethylphenyl)-5-(pyridin-4-yl)thiazol-2-yl)nicotinamide (17):**

5-Bromo-nicotinoyl chloride (39 mg, 0.178 mmol, 2.0 eq.) was added to a solution of **15a** (25 mg, 0.089 mmol, 1.0 eq.) and 4-dimethylaminopyridine (DMAP) (11 mg, 0.089 mmol, 1.0 eq.) in DMF (1 mL), and the resulting mixture was stirred at 80 °C for 16 h. Half sat. NaHCO<sub>3</sub> solution (10 mL) was added to the reaction mixture slowly at RT and the mixture extracted with ethyl acetate (3x 10 mL). The combined EtOAc layer was dried over Na<sub>2</sub>SO<sub>4</sub> and filtered. The filtrate was concentrated by rotary evaporation to obtain the crude product, which was purified by silica column to obtain a pale yellow solid. Eluant: 65–80% EtOAc in hexane. TLC: R<sub>f</sub> ~ 0.4 in 50% EtOAc in hexane (1:1). Yield: 24 mg (59%).

<sup>1</sup>H NMR (400 MHz, DMSO-d<sub>6</sub>) δ 13.24 (s, 1H), 9.20 (d, *J* = 1.9 Hz, 1H), 8.96 (d, *J* = 2.2 Hz, 1H), 8.72 (d, *J* = 2.1 Hz, 1H), 8.56 – 8.50 (m, 2H), 7.34 – 7.28 (m, 2H), 7.09 (s, 2H), 7.03 (s, 1H), 3.27 (s, 0H), 2.23 (s, 6H).

HRMS (ESI) *m/z*: [M+H]<sup>+</sup> calculated for C<sub>22</sub>H<sub>18</sub>N<sub>4</sub>OS<sup>79</sup>Br: 465.0385; found 465.0390.

**Methyl (E)-3-(3-methyl-5-(2-(nicotinamido)-5-(pyridin-4-yl)thiazol-4-yl)phenyl)acrylate (19):**

In an oven dried 10 mL microwave vial, compound **16d** (6 mg, 12  $\mu\text{mol}$ , 1.0 eq.),  $\text{Pd}(\text{OAc})_2$  (0.3 mg, 1.2  $\mu\text{mol}$ , 0.1 eq.),  $\text{P}(o\text{-tol})_3$  (0.73 mg, 2.4  $\mu\text{mol}$ , 0.2 eq.) were combined and dissolved in dry DMA (1.0 mL). To this vial,  $\text{Et}_3\text{N}$  (7  $\mu\text{L}$ , 4 eq.), and methyl acrylate (4  $\mu\text{L}$ , 0.212 mmol, 2.0 eq.) were added, and the reaction mixture was purged with nitrogen for 2 min. The solution was stirred under nitrogen at 80  $^\circ\text{C}$  for 20 h. The solvent was removed by rotary evaporation to obtain the crude product, which was purified by silica column to obtain the pure product (**19**). Yield: 1.8 mg (33%). Eluent: 50–60% EtOAc in hexane.

$^1\text{H}$  NMR (400 MHz,  $\text{DMSO-d}_6$ )  $\delta$  13.24 (s, 1H), 9.26 (d,  $J = 2.3$  Hz, 1H), 8.84 – 8.78 (m, 1H), 8.54 (d,  $J = 5.1$  Hz, 2H), 8.50 – 8.43 (m, 1H), 7.65 – 7.51 (m, 4H), 7.39 (s, 1H), 7.35 – 7.29 (m, 2H), 6.48 (d,  $J = 16.0$  Hz, 1H), 3.71 (s, 3H), 2.31 (s, 3H).

HRMS (ESI)  $m/z$ :  $[\text{M}+\text{H}]^+$  calculated for  $\text{C}_{25}\text{H}_{21}\text{N}_4\text{O}_3\text{S}$ : 457.1334; found 457.1328.

**N-(4-(3-((5-chlorothiophen-2-yl)ethynyl)-5-methylphenyl)-5-(pyridin-4-yl)thiazol-2-yl)nicotinamide (20):**

In an oven dried 10 mL microwave vial, compound **16d** (7.2 mg, 14.5  $\mu\text{mol}$ , 1.0 eq.),  $\text{PdCl}_2(\text{PPh}_3)_2$  (2.4 mg, 3.46  $\mu\text{mol}$ , 0.24 eq.),  $\text{CuI}$  (1.0 mg, 3.64  $\mu\text{mol}$ , 0.4 eq.) were combined and dissolved in dry DMF (1.0 mL). To this vial,  $\text{Et}_3\text{N}$  (50  $\mu\text{L}$ , 36.1  $\mu\text{mol}$ , 2.5 eq.), and 2-chloro-5-ethynylthiophene (10  $\mu\text{L}$ , 91  $\mu\text{mol}$ , 6.3 eq.) were added successively, and the reaction mixture was purged with nitrogen for 2 min. The solution was stirred under nitrogen at 80  $^\circ\text{C}$  for 16 h. The reaction mixture was cooled to room temperature, diluted with EtOAc (5 mL), and passed through a short silica plug. The solvent was removed under vacuum to obtain the crude product, which was purified by silica column to obtain the pure product (**20**). Yield: 4.4 mg (59%). Eluent: 50–55% EtOAc in hexane.

$^1\text{H}$  NMR (400 MHz,  $\text{DMSO-d}_6$ )  $\delta$  13.21 (s, 1H), 9.25 (s, 1H), 8.82 (s, 1H), 8.57 (s, 2H), 8.46 (d,  $J = 8.2$  Hz, 1H), 7.65 – 7.51 (m, 3H), 7.41 (d,  $J = 4.6$  Hz, 2H), 7.35 (s, 2H), 7.30 (d,  $J = 4.0$  Hz, 1H), 7.17 (d,  $J = 4.0$  Hz, 1H), 2.29 (s, 3H).

HRMS (ESI)  $m/z$ :  $[\text{M}+\text{H}]^+$  calculated for  $\text{C}_{27}\text{H}_{18}\text{N}_4\text{OS}_2\text{Cl}$ : 513.0611; found 513.0608.

**Figure S1.** Binding curves of **16c** and **16d** (MRS7907) at A<sub>1</sub>AR.

A

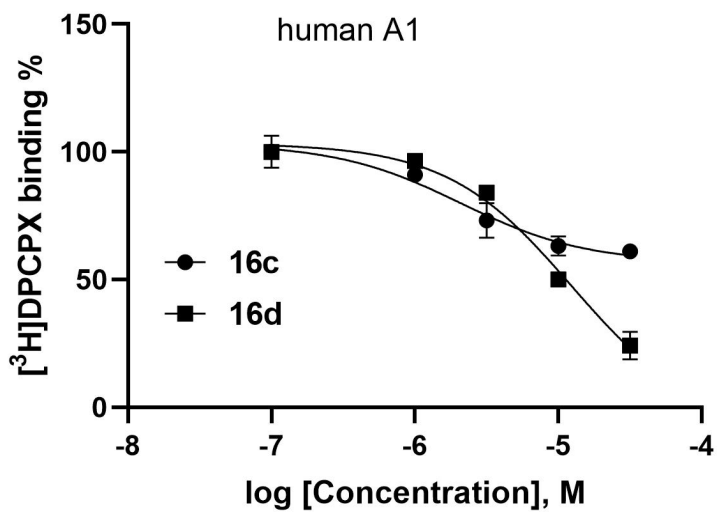

B

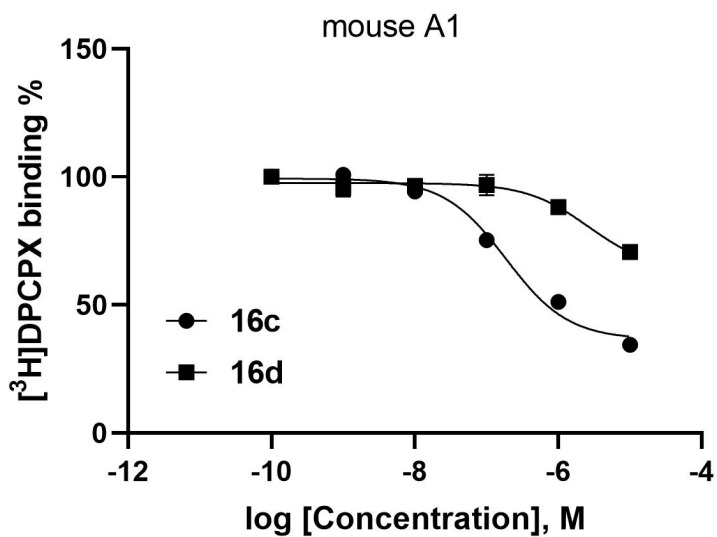

## Radiochemical purity

## Certificate of Analysis

|                   |
|-------------------|
| <b>MT-1003183</b> |
|-------------------|

MRS7799, [<sup>3</sup>H]-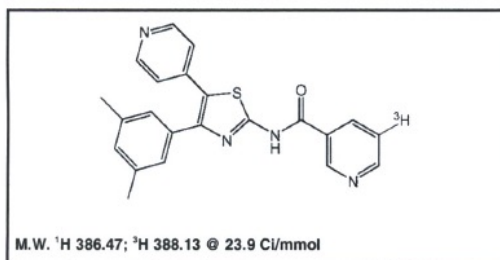

Lot #: 592-150-0239-A-20210622-JPL

Molar Activity by LC-MS: 23.9 Ci/mmol

Concentration: 1.0 mCi/ml; 16.24 µg/ml

Packaged in: Ethanol solution

Date of Analysis: June 22, 2021

Radiochemical Purity by HPLC: 97%

Column: Phenomenex Kinetex XB-C18 3.0 x 150mm, 5µm

Flow Rate: 1 ml/min.

Mobile Phase: A: Water with 0.1% TFA  
 B: Acetonitrile  
 0-15min 0-100% B; Hold to 20min.

ID by HPLC: The retention time is consistent with that of the standard

ID by LC-MS: Conforms to reference standard

ID by <sup>3</sup>H NMR: Results confirm label position indicated in structure

Storage Recommendation: Store at -20°C.

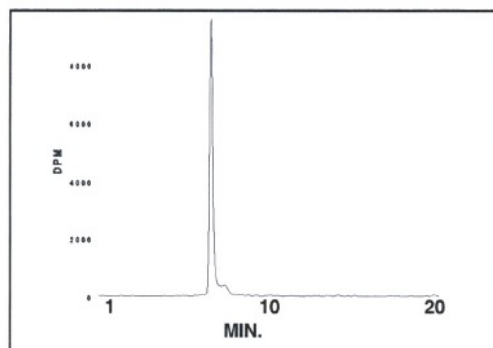

HPLC ANALYSIS LOT 592-150-0239-A-20210622-JPL  
 File Name: int4g13O Date and Time: 6/22/2021 2:27:14 PM  
 HPLC-04 - Radio

| Peak # | Area % | Time    | Area        |
|--------|--------|---------|-------------|
| 1      | 97.45  | 6.63000 | 13838.44863 |
| 2      | 0.20   | 7.13000 | 28.52257    |
| 3      | 2.34   | 7.43330 | 332.95790   |
| Totals | 100.00 |         | 14199.92910 |

## Off-target Screening

**Determined by the Psychoactive Drug Screening Program (PDSP) at the University of North Carolina.** We thank Dr. Bryan L. Roth (Univ. North Carolina at Chapel Hill) and National Institute of Mental Health's Psychoactive Drug Screening Program (Contract # HHSN-271-2008-00025-C) for screening data.

Procedures are described in Besnard et al.<sup>2</sup> and at: <https://pdsp.unc.edu/pdspweb/content/UNC-CH%20Protocol%20Book.pdf>

Unless noted in the text, no significant interactions (<50% inhibition at 10  $\mu$ M) for any of the compounds were found at the following sites (human unless noted): 5HT<sub>1A</sub>, 5HT<sub>1B</sub>, 5HT<sub>1D</sub>, 5HT<sub>1E</sub>, 5HT<sub>2A</sub>, 5HT<sub>2B</sub>, 5HT<sub>2C</sub>, 5HT<sub>3</sub>, 5HT<sub>5A</sub>, 5HT<sub>6</sub>, 5HT<sub>7</sub>,  $\alpha$ <sub>1A</sub>,  $\alpha$ <sub>1B</sub>,  $\alpha$ <sub>1D</sub>,  $\alpha$ <sub>2A</sub>,  $\alpha$ <sub>2B</sub>,  $\alpha$ <sub>2C</sub>,  $\beta$ <sub>1</sub>,  $\beta$ <sub>2</sub>,  $\beta$ <sub>3</sub>, BZP rat brain site, D<sub>1</sub>, D<sub>2</sub>, D<sub>3</sub>, D<sub>4</sub>, D<sub>5</sub>, delta opioid receptor (DOR), kappa opioid receptor (KOR), GABA<sub>A</sub>, H<sub>1</sub>, H<sub>2</sub>, H<sub>3</sub>, H<sub>4</sub>, M<sub>1</sub>, M<sub>2</sub>, M<sub>3</sub>, M<sub>4</sub>, M<sub>5</sub>, mu opioid receptor (MOR),  $\sigma$ <sub>1</sub>,  $\sigma$ <sub>2</sub>, DAT, NET, SERT, TSPO.

**Table S1.**

### Off-target binding of **16d** at 10 $\mu$ M

| Protein            | Mean (% inhibition at 10 $\mu$ M) |         |        |
|--------------------|-----------------------------------|---------|--------|
| 5-HT1A             | 5.63                              | D1      | 11.49  |
| 5-HT1B             | 7.01                              | D2      | 49.25  |
| 5-HT1D             | 11.76                             | D3      | 64.85  |
| 5-HT1E             | 8.03                              | D4      | 61.68  |
| 5-HT2A             | 6.53                              | D5      | -16    |
| 5-HT2B             | 5.63                              | DAT     | -7.75  |
| 5-HT2C             | 14.95                             | DOR     | 12.05  |
| 5-HT3              | 29.37                             | GABAA   | 12.94  |
| 5-HT5A             | -10.31                            | H1      | -24.32 |
| 5-HT6              | 19.33                             | H2      | 15.41  |
| 5-HT7A             | 5.47                              | H3      | -29.13 |
| Alpha1A            | -23.28                            | H4      | 5.24   |
| Alpha1B            | -10.83                            | KOR     | 15.75  |
| Alpha1D            | 29                                | M1      | 15.16  |
| Alpha2A            | -2.96                             | M2      | 17.67  |
| Alpha2B            | -19.58                            | M3      | 6.01   |
| Alpha2C            | 17.74                             | M4      | 8.36   |
| Beta1              | -27.85                            | M5      | -6.3   |
| Beta2              | -9.18                             | MOR     | 10.6   |
| Beta3              | -69.4 *                           | NET     | 12.29  |
| BZP Rat Brain Site | 26.47                             | PBR     | 77.36  |
|                    |                                   | SERT    | -5.95  |
|                    |                                   | Sigma 1 | 40.06  |
|                    |                                   | Sigma 2 | 70.29  |

\*K<sub>i</sub> >10  $\mu$ M, determined in secondary binding

Determined by the NIMH Psychoactive Drug Screening Program, Univ. of North Carolina

### Pharmacokinetics of **9** in Male Sprague-Dawley Rats

Compound **9** was formulated in 10% DMSO/30% PEG400 in phosphate-buffered saline (pH 8.5). Compound **9** was administered as an intravenous bolus at a dose of 1 mg/kg to male Sprague-Dawley rats (n=2 per timepoint). Plasma and brain samples were obtained at 0.083-, 0.25-, 0.5-, 1-, 2-, 4- and 8-h post-dose. At each timepoint, animals were euthanized, blood and brain samples were obtained. Blood samples were transferred to heparinized tubes for preparation of plasma, and brain samples were obtained, rinsed in ice-cold phosphate-buffered saline. Samples were then flash-frozen and stored at -80 °C until bioanalysis. Concentration-time data for **9** were analyzed using Phoenix WinNonLin (Certara, Princeton, NJ, USA) to generate pharmacokinetic data for brain and plasma  $C_{max}$ ,  $T_{max}$ , AUC, clearance (CL), volume of distribution ( $V_d$ ), half-life ( $t_{1/2}$ ) and extrapolated initial plasma and brain concentration ( $C_0$ ).

### Plasma and Brain Binding of **9**

The binding of **9** was determined in ex vivo plasma samples from **9**-dosed rats, and rat brain homogenates spiked with **9**. Plasma samples obtained at 0.083-, 0.25- and 0.5-h post dose were pooled for binding studies. Brain homogenates from naïve animals were spiked with 1  $\mu$ M **9** for binding studies. Antipyrene, sulfamethoxazole and (-)-warfarin were employed as positive controls for low, moderate and high binding to validate the integrity of the binding studies. Plasma and brain homogenates were incubated for 5 h at 37 °C in rapid equilibrium dialysis (RED) devices (ThermoFisher Scientific, Waltham, MA, USA) (n=3). At the end of the incubation period, aliquots from the sample and buffer side of the RED devices were analyzed by LC-MS/MS for quantitation of **9** concentrations and calculation of percent bound and free fraction in each tissue matrix.

### Bioanalytical Analysis of **9**

Concentrations of **9** in rat plasma and brain samples were obtained using a LC-MS/MS bioanalytical method developed for the compound. The method is summarized in Table 1. Briefly, a gradient liquid-chromatography method was employed (Sciex Exion, Sciex, Framingham, MA, USA), following by MS/MS monitoring of the **9** (Q1 and Q3 masses of 387.10 and 266.10 Daltons, respectively, AB Sciex 5500, Sciex, Framingham, MA, USA). Tolbutamide was employed as an internal standard. The lower limits of quantitation of **9** in plasma and brain samples were 1 ng/mL and 1 ng/g, respectively. The respective upper limits of quantitation were 1000 ng/mL and 1000 ng/g.

**Table S2.**  
**Summary of bioanalytical methods for quantitation of 9**

| <b>Bioanalysis Methods</b>                                              |                                                  |                    |
|-------------------------------------------------------------------------|--------------------------------------------------|--------------------|
| <b>System Components</b>                                                |                                                  |                    |
| Module                                                                  | Manufacturer                                     | Model              |
| LC                                                                      | Sciex                                            | Exion              |
| Autosampler                                                             | Sciex                                            | AD Multiplate      |
| MS Detection                                                            | AB Sciex                                         | 5500 Triple Quad 6 |
| <b>HPLC Method</b>                                                      |                                                  |                    |
| Column                                                                  | Restek Force Biphenyl 1.8 $\mu$ m (30 x 2.1 mm)  |                    |
| Elution                                                                 | Gradient, 0.6 mL/min                             |                    |
|                                                                         | Mobile Phase A: 0.1% Formic Acid in Water        |                    |
|                                                                         | Mobile Phase B: 0.1% Formic Acid in Acetonitrile |                    |
| <b>MS Detection and Calibration for MRS7799 in Rat Plasma</b>           |                                                  |                    |
| Peak Name: Tolbutamide                                                  |                                                  |                    |
| Use as Internal Standard                                                |                                                  |                    |
| Q1/Q3 Masses: 271.00/155.00 Da                                          |                                                  |                    |
| Peak Name: MRS7799                                                      |                                                  |                    |
| Internal Standard: Tolbutamide                                          |                                                  |                    |
| Q1/Q3 Masses: 387.10/266.10 Da                                          |                                                  |                    |
| Fit                                                                     | Quadratic                                        | Weighting 1 / x    |
| A                                                                       | -0.000000427                                     |                    |
| B                                                                       | 0.0173                                           |                    |
| C                                                                       | 0.00959                                          |                    |
| Correlation coefficient                                                 | 0.9967                                           |                    |
| Use Area                                                                |                                                  |                    |
| <b>MS Detection and Calibration for MRS7799 in Rat Brain Homogenate</b> |                                                  |                    |
| Peak Name: Tolbutamide                                                  |                                                  |                    |
| Use as Internal Standard                                                |                                                  |                    |
| Q1/Q3 Masses: 271.00/155.00 Da                                          |                                                  |                    |
| Peak Name: MRS7799                                                      |                                                  |                    |
| Internal Standard: Tolbutamide                                          |                                                  |                    |
| Q1/Q3 Masses: 387.10/266.10 Da                                          |                                                  |                    |
| Fit                                                                     | Quadratic                                        | Weighting 1 / x    |
| A                                                                       | -0.00000228                                      |                    |
| B                                                                       | 0.0170                                           |                    |
| C                                                                       | 0.00484                                          |                    |
| Correlation coefficient                                                 | 0.9963                                           |                    |
| Use Area                                                                |                                                  |                    |

### Estimation of Plasma and Brain A<sub>3</sub> Adenosine Receptor Occupancy of 9

Unbound plasma and brain concentrations of compounds can be used to estimate peripheral and central receptor occupancy using receptor affinity data and simple mass action equations.<sup>3,4</sup> Using unbound plasma and brain concentrations of 9 obtained from the rat pharmacokinetic study and the experimentally determined K<sub>i</sub> of 9 for the rat A<sub>3</sub> receptor (our value of 1.6 nM, rather than 0.36

nM as determined previously<sup>1</sup>), estimations of peripheral and brain receptor occupancy (%RO) were determined using **Equation 1**:

$$\%RO = \frac{(C)_{ub}}{K_i + (C)_{ub}} * 100$$

where  $(C)_{ub}$  is the unbound matrix molar concentration of **9** and  $K_i$  is the affinity constant for **9** for rat  $A_3R$ .

**Table S3.** Estimated Brain  $A_3AR$  Occupancy.

| Dose (mg/kg) | $K_i$ (nM) | $F_{ub}$ Brain | Total [Brain] (nM, $C_{max}$ ) | Unbound [Brain] (nM, $C_{max}$ ) | %RO Max | Total [Brain] (nM, Avg) | Unbound [Brain] (nM, Avg) | %RO Avg |
|--------------|------------|----------------|--------------------------------|----------------------------------|---------|-------------------------|---------------------------|---------|
| 1            | 1.6        | 0.03           | 1968                           | 59                               | 97      | 246                     | 7.4                       | 82      |
| 3            | 1.6        | 0.03           | 5907                           | 177                              | 99      | 738                     | 22                        | 93      |
| 10           | 1.6        | 0.03           | 17721                          | 531                              | 100     | 2215                    | 66                        | 98      |
| 30           | 1.6        | 0.03           | 53163                          | 1594                             | 100     | 6645                    | 199                       | 99      |

**Figure S2.** Estimated  $A_3AR$  Occupancy as Function of Time 3 mg/kg Intravenous Dose, No Residence Time Assumptions.

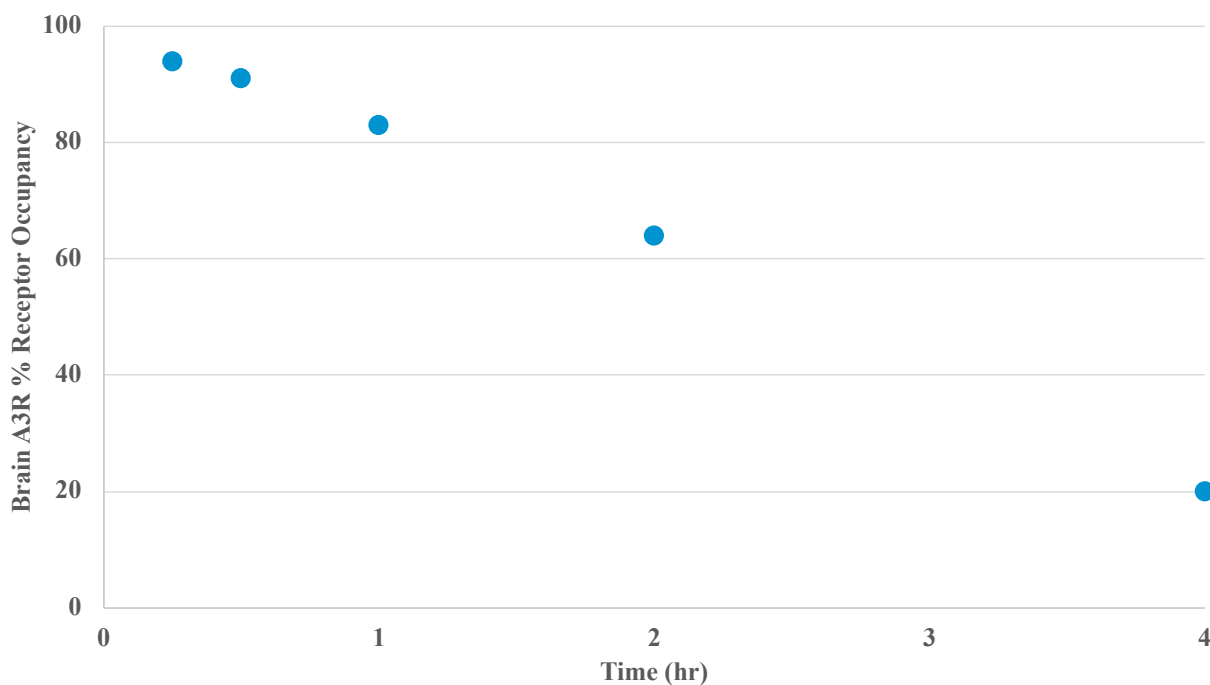



**Table S4.** Other thiazole-2-amines in the literature that have relatively high A<sub>3</sub>AR affinity. R<sup>2</sup> is H.

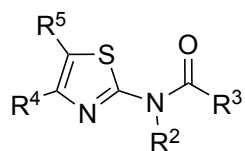

**9, 26 – 30**

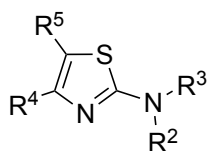

**31 – 33**

| Compound                | R <sup>3</sup>                  | R <sup>4</sup> | R <sup>5</sup> | K <sub>i</sub> (hA <sub>3</sub> AR, nM)<br>[reference] |
|-------------------------|---------------------------------|----------------|----------------|--------------------------------------------------------|
| <b>9, DPTN, MRS7799</b> |                                 |                |                | 0.36, <sup>1</sup> 1.65 <sup>5</sup>                   |
| <b>26</b>               |                                 |                | H              | 1.8<br>[compound <b>17e</b> <sup>6</sup> ]             |
| <b>27</b>               |                                 |                |                | 9.36<br>[compound <b>5d</b> <sup>7</sup> ]             |
| <b>28</b>               | CH <sub>2</sub> CH <sub>3</sub> |                | H              | 2.4<br>[compound <b>20</b> <sup>8</sup> ]              |
| <b>29</b>               | CH <sub>3</sub>                 |                |                | 0.4<br>[compound <b>3f</b> <sup>9</sup> ]              |
| <b>30</b>               |                                 |                |                | 4.63<br>[compound <b>17</b> <sup>10</sup> ]            |
| <b>31, ID-3</b>         | H                               |                |                | 1300<br>[library hit,<br><sup>11</sup> ]               |
| <b>32</b>               |                                 |                |                | 330<br>[compound <b>8n</b> <sup>9,12</sup> ]           |

|                                         |                                                                                   |                                                                                   |                                                                                   |                                                     |
|-----------------------------------------|-----------------------------------------------------------------------------------|-----------------------------------------------------------------------------------|-----------------------------------------------------------------------------------|-----------------------------------------------------|
| <b>33,</b><br><b>QAF805<sup>a</sup></b> | 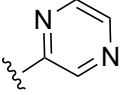 |  |  | 10.2<br>[various<br>numbers <sup>12-<br/>14</sup> ] |
|-----------------------------------------|-----------------------------------------------------------------------------------|-----------------------------------------------------------------------------------|-----------------------------------------------------------------------------------|-----------------------------------------------------|

- a. QAF805 **33**, a mixed A<sub>2B</sub>/A<sub>3</sub>AR antagonist, was in a Phase 1 clinical trial for asthma but has since been discontinued.<sup>14</sup>

## Molecular Modeling Methods

### *Homology Modeling and Protein Preparation*

A model for hA<sub>3</sub>AR and mA<sub>3</sub>AR was obtained by means of homology modeling using hA<sub>1</sub>AR as a template. In particular, the hA<sub>1</sub>AR's antagonist-bound X-ray structure with PDB ID 5UEN<sup>15</sup> was employed. The structure was prepared using the Protein Preparation Wizard tool<sup>16</sup> of the Schrödinger suite (Maestro 2021-2<sup>17</sup>), and the missing intracellular loop (IL) 3 was reconstructed with Prime<sup>18,19</sup> and minimized using OPLS4<sup>20</sup> force field and water environment.

The prepared structure was used as a template for homology modeling of hA<sub>3</sub>AR and mA<sub>3</sub>AR. A previously generated intermediate-state, agonist-bound hA<sub>3</sub>AR model<sup>21</sup> was used as a template for extracellular loop (EL) 2 (M151-F163), to be consistent with previous works.<sup>21</sup> In addition, EL3 (P261-K265) was removed from the hA<sub>1</sub>AR template, because it is 2 residues longer than A<sub>3</sub>AR's sequences. The alignment is reported in the figure below (Figure S3). The first 6 (hA<sub>3</sub>AR) and 7 (mA<sub>3</sub>AR) N-terminal residues and the last 13 C-terminal residues of both receptors were not modelled.

**Figure S3.** Sequence alignment of hA<sub>3</sub>AR (UNIPROT ID: P0DMS8) to hA<sub>1</sub>AR (PDB ID: 5UEN<sup>15</sup>), and of mA<sub>3</sub>AR (UNIPROT ID: Q61618) to hA<sub>1</sub>AR (PDB ID: 5UEN) and hA<sub>3</sub>AR (agonist-bound, intermediate state model<sup>21</sup>). The portions of template sequences that were used for modeling are highlighted.

```

hA3 - PODMS8  MPNNSIALSLANVTYITMEIFIGLCAIVGNLVICVVKLNPSLQTTTFFIVSLALADIAGVGLVMPPLAIVVSLGITIHFYSCLFMTCCLLLIFTHASIMSLLAIAVDRYLRVKLTVRYKR
hA1 - 5UEN      -----SISAFQAAAYIGIEVLIALVSFVGNLVIAVKVQNQLRDATFCFIVSLAVADVAVGALVIPLAILINIGPQTYFHTCLMVACPVLLITQSSILALLAIAVDRYLRVKIPLRYKM
hA3 - intermediate -----SLANVTYITMEIFIGLCAIVGNLVICVVKLNPSLQTTTFFIVSLALADIAGVGLVMPPLAIVVSLGITIHFYSCLFMTCCLLLIFTHASIMSLLAIAVDRYLRVKLTVRYKR

hA3 - PODMS8  VTHRRRIWLAGLGCWLVSFLVGLTPMFGWN--MKLTSEYHRN---VTFLSCQFVSVMRDMYVYFSLTWIFPLVVMCAIYLDIFYIIRNKLSLNLNSNK-ETGAFYGREFKTAKSLF
hA1 - 5UEN      VVTPRRAAVAIAGCWILSFVVGITPMFGWNLSAVERAWAANGSMGEPVIKCFEFKVISMEYMYVYFVFWLPPLLMLVIYLEVYLIIRKQLNKKVSASSGDPQKYGKELKIAKSLA
hA3 - intermediate VTHRRRIWLAGLGCWLVSFLVGLTPMFGWN--MKLTSEYHRN---VTFLSCQFVSVMRDMYVYFSLTWIFPLVVMCAIYLDIFYIIRNKLSLNLNSNK-ETGAFYGREFKTAKSLF

hA3 - PODMS8  LVLFLFALSWLPLSIIINCIIYFNGEVQVLVLYMGIILLSHANSMNPIVYAYKIKRFKETYLLILKACVVCVCHPSDSDLSIEKNSE
hA1 - 5UEN      LILFLFALSWLPHLILNCITLF---CPSILTYIAIFLTHGNSAMNPIVYAFRIKFRVTFLLKIWNDFRCPQ
hA3 - intermediate LVLFLFALSWLPLSIIINCIIYFNGEVQVLVLYMGIILLSHANSMNPIVYAYKIKRFKETYLLILKACV

mA3 - Q61618  MEADNTEEDWLNITYITMEAAIGLCAVGNMMLVIVVKLNPTLRTTYYFIVSLALADIAGVGLVPLAIAVSLQVRMHFYACLFMSCVLLIFTHASIMSLAIAVHRVLRVKLTVRYR
hA1 - 5UEN      -----SISAFQAAAYIGIEVLIALVSFVGNLVIAVKVQNQLRDATFCFIVSLAVADVAVGALVIPLAILINIGPQTYFHTCLMVACPVLLITQSSILALLAIAVDRYLRVKIPLRYKM
hA3 - intermediate -----SLANVTYITMEIFIGLCAIVGNLVICVVKLNPSLQTTTFFIVSLALADIAGVGLVMPPLAIVVSLGITIHFYSCLFMTCCLLLIFTHASIMSLLAIAVDRYLRVKLTVRYR

mA3 - Q61618  TVTQRRRWLFLGLCWLVSFLVGLTPMFGWN--RKATLASSQN---SSTLLCHFRSVVSLDYVVFFSITWILVPLVVMCIYLDIFYIIRNKLSQNLTGFR-ETRAFYGREFKTAKSL
hA1 - 5UEN      MVVTPRRAAVAIAGCWILSFVVGITPMFGWNLSAVERAWAANGSMGEPVIKCFEFKVISMEYMYVYFVFWLPPLLMLVIYLEVYLIIRKQLNKKVSASSGDPQKYGKELKIAKSL
hA3 - intermediate RVVTHRRRIWLAGLGCWLVSFLVGLTPMFGWN--MKLTSEYHRN---VTFLSCQFVSVMRDMYVYFSLTWIFPLVVMCAIYLDIFYIIRNKLSLNLNSNK-ETGAFYGREFKTAKSL

mA3 - Q61618  FLVFLFALCWLPLSIIINFSYFDVKIPDVAMCLGILLSHANSMNPIVYACKIKRFKETYLLIRAVRLCQTSGLSDSNEQVTE
hA1 - 5UEN      LILFLFALSWLPHLILNCITLF---CPSILTYIAIFLTHGNSAMNPIVYAFRIKFRVTFLLKIWNDFRCPQ
hA3 - intermediate FLVFLFALSWLPLSIIINCIIYFNGEVQVLVLYMGIILLSHANSMNPIVYAYKIKRFKETYLLILKACV

```

The models were obtained with Prime<sup>18,19</sup> (Schrödinger suite (Maestro 2021-2<sup>17</sup>)), and then prepared with the Protein Preparation Wizard tool.<sup>16</sup> The predicted tautomeric state of histidines was HIE (hydrogen at N $\epsilon$  nitrogen) for H79, H95, H124, H158 and H304, and HID (hydrogen at N $\delta$  nitrogen) for H272 in the case of hA<sub>3</sub>AR, and HIE for H80, H96 and H108 and HID for H168 and H273 in the case of mA<sub>3</sub>AR.

The models were optimized by minimizing the non-conserved residues with the OPLS4 force field and VSGB solvation model. Furthermore, a conformational search of F80 (hA<sub>3</sub>AR) and F81 (mA<sub>3</sub>AR) (with the Conformational Search tool of the Schrödinger suite (Maestro 2021-2<sup>17</sup>)) was included to relieve steric clashes.

The models were finally refined by including an Induced Fit Docking step of known antagonists, i.e. MRS1220 (hA<sub>3</sub>AR K<sub>i</sub> ~ 0.7 nM) and MRS1523 (mA<sub>3</sub>AR K<sub>i</sub> ~ 349 nM) (Figure S4). The Induced Fit Docking<sup>22</sup> tool (Schrödinger suite (Maestro 2021-2<sup>3</sup>)) was employed, using a box centered on

F168 (for hA<sub>3</sub>AR, and F169 for mA<sub>3</sub>AR) and N250 (for hA<sub>3</sub>AR, and N251 mA<sub>3</sub>AR) and with inner and outer dimensions of 10 Å and 30 Å, and with Glide-XP<sup>23,24,25</sup> scoring function. Residues within 3 Å of the ligands were refined, excluding F168/F169 and N250/N251 (hA<sub>3</sub>AR/mA<sub>3</sub>AR). Maximum 20 poses were generated, and the top scoring model was selected for each receptor (Figure S5).

**Figure S4.** Structures of MRS1220 and MRS1523.

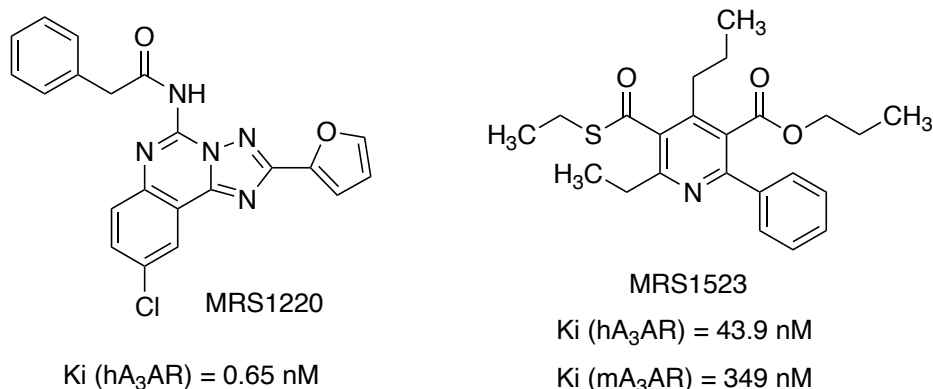

**Figure S5.** Docking poses of MRS1220 (purple) at hA<sub>3</sub>AR model (white), and of MRS1523 (pink) at mA<sub>3</sub>AR model (grey). Residues within 3 Å from the ligand are rendered by sticks.

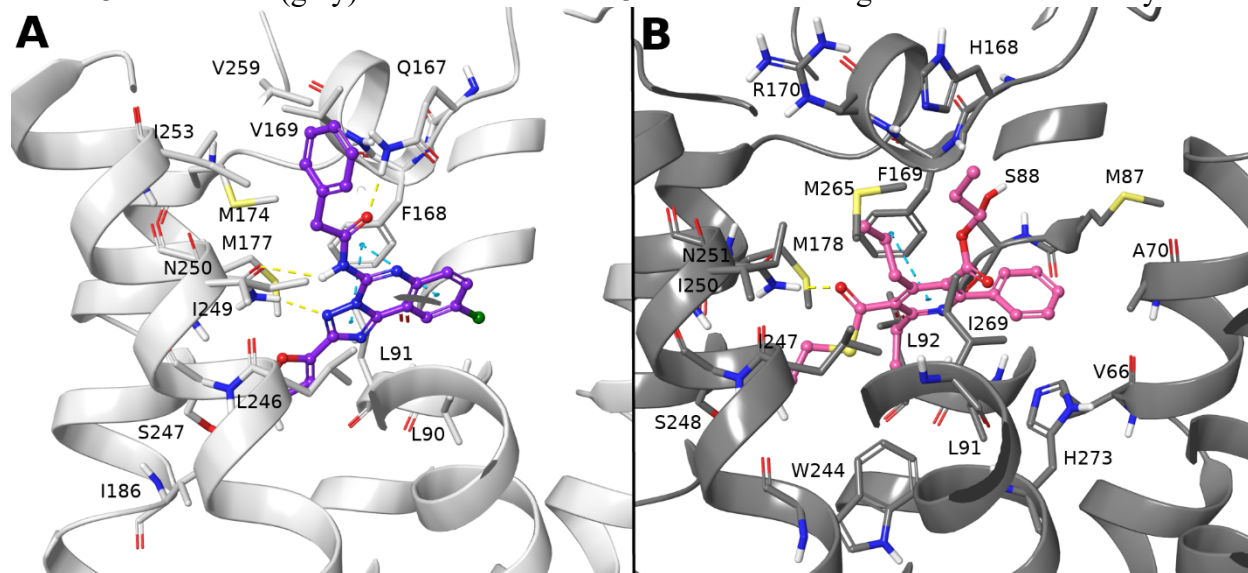

### Molecular Docking

Compounds **9** and **19** were docked to the hA<sub>3</sub>AR model obtained as described above, using Glide-XP scoring function.<sup>23,24,25</sup> In particular, the Induced Fit Docking<sup>22</sup> tool was employed to take into account the flexibility of Q167/H168 and V169/R170 (hA<sub>3</sub>AR/mA<sub>3</sub>AR). In particular, Q167/H168 and V169/R170 were trimmed and selected for optimization, while all the other residues were not refined. A grid with inner and outer boxes of 10 Å and 30 Å and centered on F168/F169 and

N250/N251(hA<sub>3</sub>AR/mA<sub>3</sub>AR) was used. A maximum of 20 poses was retained for each ligand, and one pose per ligand was selected by visual inspection among the top ranked conformations.

**Figure S6.** Superposition of the new antagonist-bound/inactive state hA<sub>3</sub>AR model (white) to a previously obtained agonist-bound/intermediate state hA<sub>3</sub>AR model<sup>21</sup> (cyan).

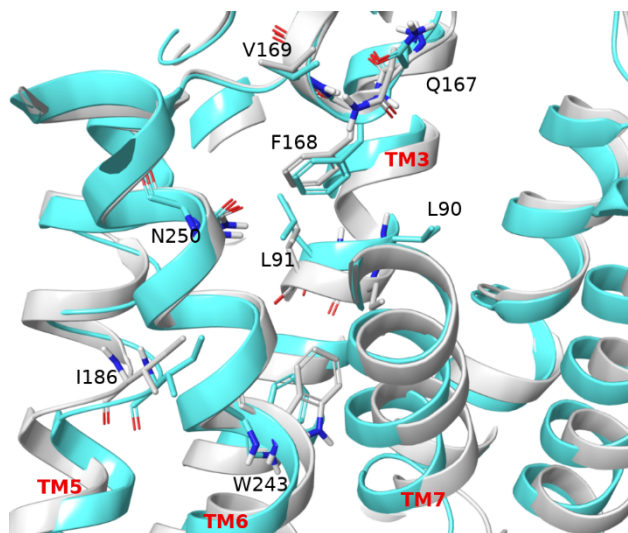

**Figure S7.** Docking poses of compound **19** (orange) at hA<sub>3</sub>AR (A) and mA<sub>3</sub>AR (B) models. Residues within 3 Å from the ligand are rendered by sticks.

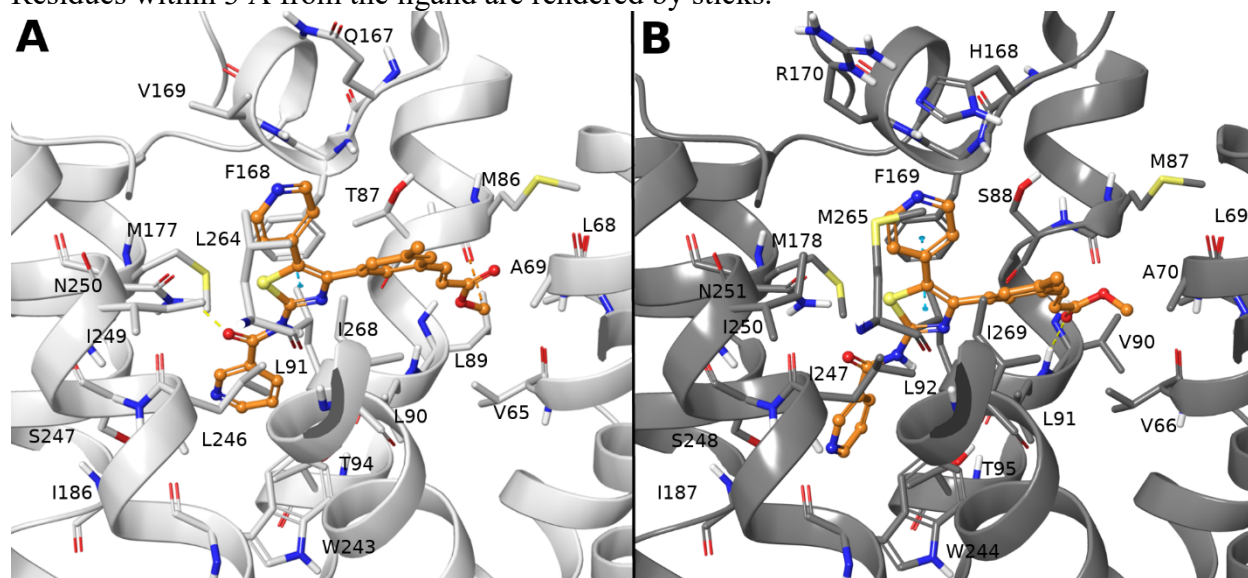

**References:**

1. Miwatashi, S.; Arikawa, Y.; Matsumoto, T.; Uga, K.; Kanzaki, N.; Imai, Y. N.; Ohkawa, S. Synthesis and biological activities of 4-phenyl-5-pyridyl-1,3-thiazole derivatives as selective adenosine A<sub>3</sub> antagonists. *Chem Pharm Bull (Tokyo)* **2008**, *56*(8), 1126–1137. doi: 10.1248/cpb.56.1126.
2. Besnard, J.; Ruda, G. F.; Setola, V.; Abecassis, K.; Rodriguiz, R. M.; Huang, X. P.; Norval, S.; Sassano, M. F.; Shin, A. I.; Webster, L. A.; Simeons, F. R.; Stojanovski, L.; Prat, A.; Seidah, N. G.; Constam, D. B.; Bickerton, G. R.; Read, K. D.; Wetsel, W. C.; Gilbert, I. H.; Roth, B. L.; Hopkins, A. L. Automated design of ligands to polypharmacological profiles. *Nature* **2012**, *492*, 215–220.
3. Liu, X.; Vilenski, O.; Kwan, J.; Apparsundaram, S.; Weikert, R. Unbound brain concentration determines receptor occupancy: A correlation of drug concentration and brain serotonin and dopamine reuptake transporter occupancy for eighteen compounds in rats. *Drug Metab. Dispos.* **2009**, *37*, 1548–1556.
4. Watson, J.; Wright, S.; Lucas, A.; Clarke, K. L.; Viggers, J.; Cheetham, S.; Jeffrey, P.; Porter, R.; Read, K. D. Receptor occupancy and brain free fraction. *Drug Metab. Dispos.* **2009**, *37*, 753–760.
5. Gao, Z. G.; Suresh, R. R.; Jacobson, K. A. Pharmacological characterization of DPTN and other selective A<sub>3</sub> adenosine receptor antagonists. *Purinergic Signalling*, **2021**, *17*, 737–746, 10.1007/s11302-021-09823-5.
6. van Muijlwijk-Koezen, J. E.; Timmerman, H.; Vollinga, R. C.; von Drabbe Künzel, J. F.; de Groote, M.; Visser, S.; IJzerman, A. P. *J. Med. Chem.* **2001**, *44*, 749–762.
7. Inamdar, G. S.; Pandya, A. N.; Thakar, H. M.; Sudarsanam, V.; Kachler, S.; Sabbadin, D.; Moro, S.; Klotz, K.-N.; Vasu, K. K. New insight into adenosine receptors selectivity derived from a novel series of [5-substituted-4-phenyl-1,3-thiazol-2-yl] benzamides and furamides. *Eur. J. Med. Chem.*, **2013**, *63*, 924–934.
8. Jung, K. Y.; Kim, S. K.; Gao, Z. G.; Gross, A. S.; Jacobson, K. A.; Kim, Y. C. Structure activity relationships of thiazole and thiadiazole derivatives as potent adenosine A<sub>3</sub> receptor antagonists. *Bioorg. Med. Chem.*, **2004**, *12*, 613–623.
9. Press, N. J.; Keller, T. H.; Tranter, P.; Beer, D.; Jones, K.; Faessler, A.; Heng, R.; Lewis, C.; Howe, T.; Gedeck, P.; Mazzoni, L.; Fozard, J. R. New highly potent and selective adenosine A<sub>3</sub> receptor antagonists. *Curr. Top. Med. Chem.* **2004**, *4*, 863–870.
10. Abdelrahman, A.; Yerande, S. G.; Namasivayam, V.; Klapschinski, T. A.; Alnouri, M. W.; El-Tayeb, A.; Müller, C. E. Substituted 4-phenylthiazoles: Development of potent and selective A<sub>1</sub>, A<sub>3</sub> and dual A<sub>1</sub>/A<sub>3</sub> adenosine receptor antagonists. *Eur. J. Med. Chem.*, **2020**, *186*, 111879.
11. Webb, T. R.; Melman, N.; Lvovskiy, D.; Ji, X. D.; Jacobson, K. A. The utilization of a unified pharmacophore query in the discovery of new antagonists of the adenosine receptor family. *Bioorg. Med. Chem. Lett.*, **2000**, *10*, 31–34.
12. Pandya, D. H.; Sharma, J. A.; Jalani, H. B.; Pandya, A. N.; Sudarsanam, V.; Kachler, S.; Klotz, K. N.; Vasu, K. K. Novel thiazole-thiophene conjugates as adenosine receptor antagonists: synthesis, biological evaluation and docking studies. *Bioorg. Med. Chem. Lett.* **2015**, *25*(6), 1306–1309.
13. Pandya, A. N.; Baraiya, A. B.; Jalani, H. B.; Pandya, D.; Kaila, J. C.; Kachler, S.; Salmaso, V.; Moro, S.; Klotz, K.-N.; Vasu, K. K. Discovery of 2-aminoimidazole and 2-amino

- imidazolyl-thiazoles as non-xanthine human adenosine A<sub>3</sub> receptor antagonists: SAR and molecular modeling studies. *MedChemComm*, **2018**, 9(4), 676–684.
14. Müller, C.E., Jacobson, K.A. Recent developments in adenosine receptor ligands and their potential as novel drugs. *Biochim. Biophys. Acta - Biomembranes*, **2011**, 1808, 1290–1308.
  15. Glukhova, A.; Thal, D. M.; Nguyen, A. T.; Vecchio, E. A.; Jörg, M.; Scammells, P. J.; May, L. T.; Sexton, P. M.; Christopoulos, A. Structure of the adenosine A<sub>1</sub> receptor reveals the basis for subtype selectivity. *Cell* **2017**, 168, 867–877.e13 DOI: 10.1016/j.cell.2017.01.042.
  16. Sastry, G. M.; Adzhigirey, M.; Day, T.; Annabhimoju, R.; Sherman, W. Protein and ligand preparation: parameters, protocols, and influence on virtual screening enrichments. *J. Comput. Aided Mol. Des.* **2013**, 27, 221–234 DOI: 10.1007/s10822-013-9644-8.
  17. Schrödinger Release 2021-2: Maestro; Schrödinger, LLC: New York, NY, 2021.
  18. Sherman, W.; Day, T.; Jacobson, M. P.; Friesner, R. A.; Farid, R. Novel procedure for modeling ligand/receptor induced fit effects. *J. Med. Chem.* **2006**, 49, 534–553 DOI: 10.1021/jm050540c.
  19. Lee, S.; Nivedha, A. K.; Tate, C. G.; Vaidehi, N. Dynamic role of the G protein in stabilizing the active state of the adenosine A<sub>2A</sub> receptor. *Structure* **2019**, 27, 703–712.e3 DOI: 10.1016/j.str.2018.12.007.
  20. Lu, C.; Wu, C.; Ghoreishi, D.; Chen, W.; Wang, L.; Damm, W.; Ross, G. A.; Dahlgren, M. K.; Russell, E.; Von Bargen, C. D.; Abel, R.; Friesner, R. A.; Edward D. Harder, E. D. OPLS4: improving force field accuracy on challenging regimes of chemical space. *J. Chem. Theory Comput.* **2021**, 17, 4291–4300 DOI: 10.1021/acs.jctc.1c00302.
  21. Tosh, D. K.; Salmaso, V.; Rao, H.; Bitant, A.; Fisher, C. L.; Lieberman, D. I.; Vorbrüggen, H.; Reitman, M. L.; Gavrilo, O.; Gao, Z.-G.; Auchampach, J. A.; Jacobson, K. A. Truncated (N)-methanocarba nucleosides as partial agonists at mouse and human A<sub>3</sub> adenosine receptors: Affinity enhancement by N<sup>6</sup>-(2-phenylethyl) substitution. *J. Med. Chem.* **2020**, 63, 4334–4348.
  22. Sherman, W.; Day, T.; Jacobson, M. P.; Friesner, R. A.; Farid, R. Novel procedure for modeling ligand/receptor induced fit effects. *J. Med. Chem.* **2006**, 49, 534–553 DOI: 10.1021/jm050540c.
  23. Friesner, R. A.; Banks, J. L.; Murphy, R. B.; Halgren, T. A.; Klicic, J. J.; Mainz, D. T.; Repasky, M. P.; Knoll, E. H.; Shelley, M.; Perry, J. K.; Shaw D. E.; Francis P.; Shenkin, P. S. Glide: a new approach for rapid, accurate docking and scoring. 1. Method and assessment of docking accuracy. *J. Med. Chem.* **2004**, 47, 1739–1749 DOI: 10.1021/jm0306430.
  24. Halgren, T. A.; Murphy, R. B.; Friesner, R. A.; Beard, H. S.; Frye, L. L.; Pollard, W. T.; Banks, J. L. Glide: a new approach for rapid, accurate docking and scoring. 2. Enrichment factors in database screening. *J. Med. Chem.* **2004**, 47, 1750–1759 DOI: 10.1021/jm030644s.
  25. Friesner, R. A.; Murphy, R. B.; Repasky, M. P.; Frye, L. L.; Greenwood, J. R.; Halgren, T. A.; Sanschagrin, P. C.; Mainz, D. T. Extra precision glide: docking and scoring incorporating a model of hydrophobic enclosure for protein-ligand complexes. *J. Med. Chem.* **2006**, 49, 6177–6196 DOI: 10.1021/jm051256o

## Representative NMR and mass spectra

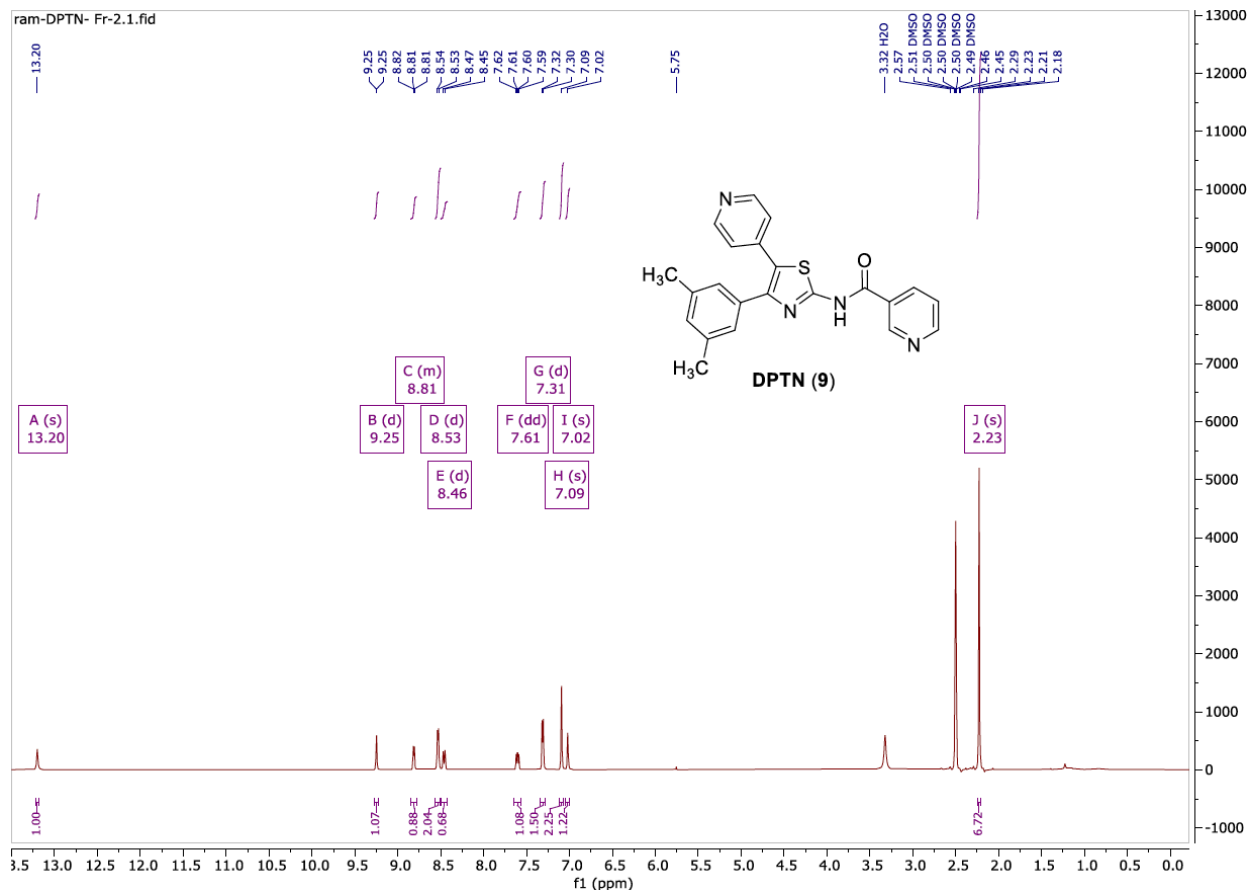

## Elemental Composition Report

Page 1

## Single Mass Analysis

Tolerance = 5.0 mDa / DBE: min = -1.5, max = 100.0

Element prediction: Off

Number of isotope peaks used for i-FIT = 3

## Monoisotopic Mass, Even Electron Ions

62 formula(e) evaluated with 1 results within limits (up to 50 closest results for each mass)

Elements Used:

C: 0-100 H: 0-200 N: 4-4 O: 0-50 32S: 1-1

RAM-29NOV21-DPTN 205 (3.484) AM2 (Ar,25000.0,0.0,0.0); ABS

TOF MS ES+

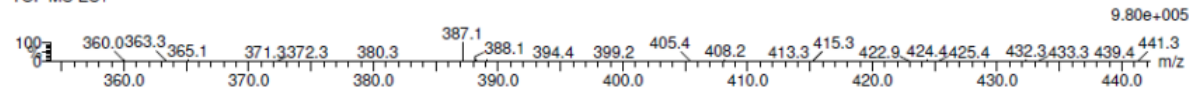

Minimum: -1.5  
Maximum: 5.0 3.0 100.0

| Mass     | Calc. Mass | mDa  | PPM  | DBE  | i-FIT | Norm | Conf (%) | Formula          |
|----------|------------|------|------|------|-------|------|----------|------------------|
| 387.1279 | 387.1280   | -0.1 | -0.3 | 15.5 | 496.8 | n/a  | n/a      | C22 H19 N4 O 32S |



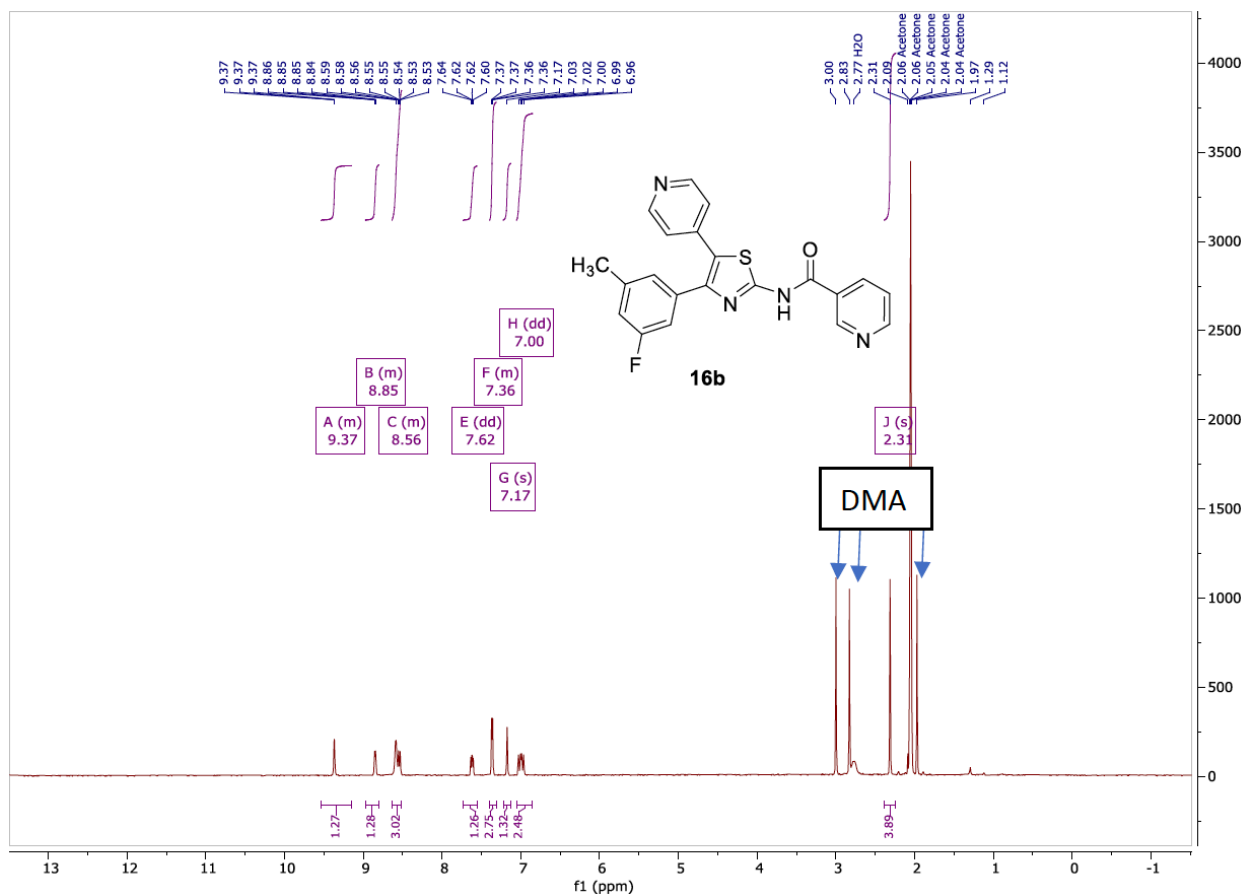

## Elemental Composition Report

Page 1

### Single Mass Analysis

Tolerance = 5.0 mDa / DBE: min = -1.5, max = 100.0

Element prediction: Off

Number of isotope peaks used for i-FIT = 3

Monoisotopic Mass, Even Electron Ions

54 formula(e) evaluated with 1 results within limits (up to 50 closest results for each mass)

Elements Used:

C: 0-100 H: 0-250 N: 4-4 O: 0-50 32S: 1-1 F: 1-1

RAM-04MAY21-458-CC 111 (1.894) AM2 (Ar,25000.0,0.00,0.00); ABS

TOF MS ES+

5.42e+005

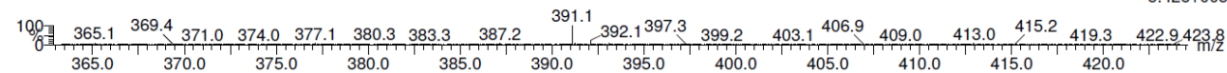

Minimum: -1.5  
Maximum: 5.0 5.0 100.0

| Mass     | Calc. Mass | mDa | PPM | DBE  | i-FIT | Norm | Conf (%) | Formula            |
|----------|------------|-----|-----|------|-------|------|----------|--------------------|
| 391.1031 | 391.1029   | 0.2 | 0.5 | 15.5 | 527.2 | n/a  | n/a      | C21 H16 N4 O 32S F |

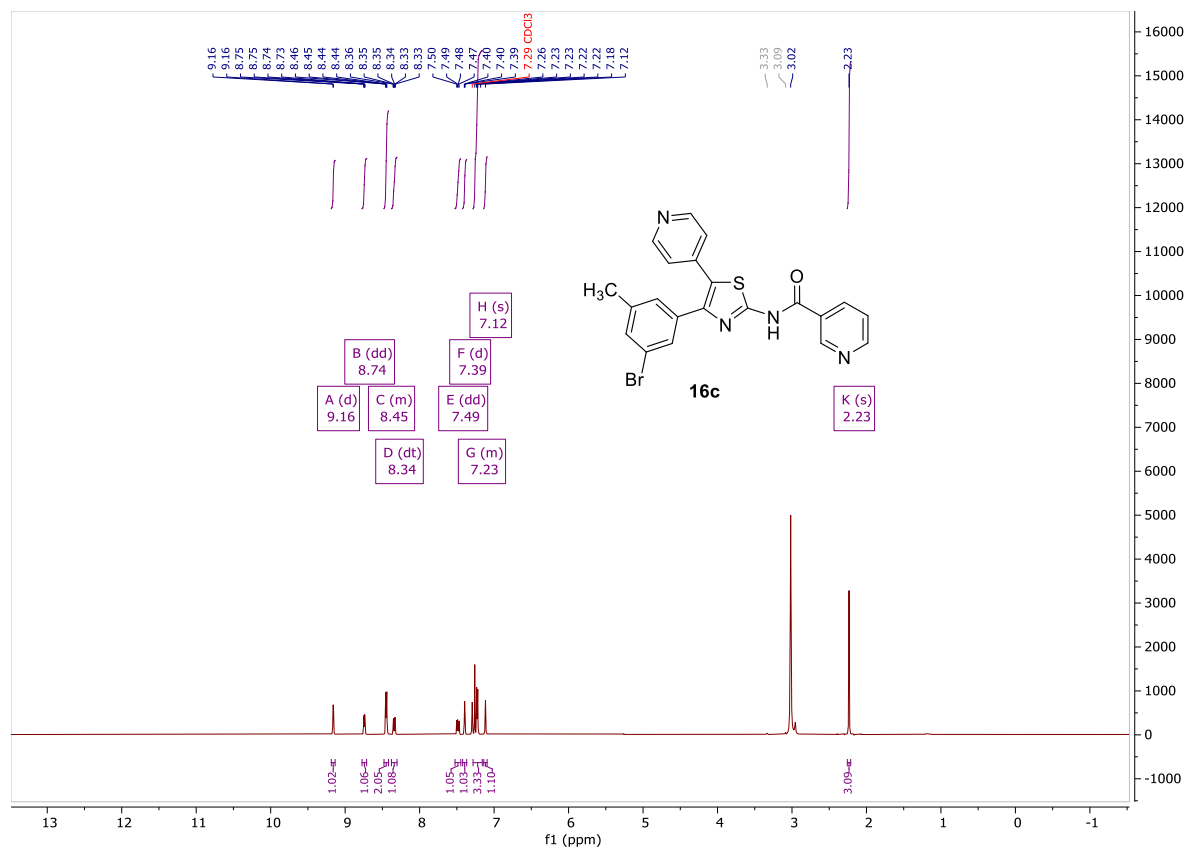

## Elemental Composition Report

Page 1

### Single Mass Analysis

Tolerance = 5.0 mDa / DBE: min = -1.5, max = 100.0

Element prediction: Off

Number of isotope peaks used for i-FIT = 3

Monoisotopic Mass, Even Electron Ions

54 formula(e) evaluated with 1 results within limits (up to 50 closest results for each mass)

Elements Used:

C: 0-100 H: 0-250 N: 4-4 O: 0-60 79Br: 1-1 32S: 1-1

RAM-13FEB20-400-F-HPLC 93 (1.590) AM2 (Ar,25000.0,0.00,0.00); ABS

TOF MS ES+

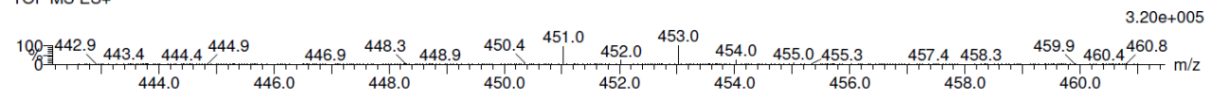

Minimum: -1.5  
Maximum: 5.0 5.0 100.0

| Mass     | Calc. Mass | mDa | PPM | DBE  | i-FIT | Norm | Conf (%) | Formula               |
|----------|------------|-----|-----|------|-------|------|----------|-----------------------|
| 451.0235 | 451.0228   | 0.7 | 1.6 | 15.5 | 417.3 | n/a  | n/a      | C21 H16 N4 O 79Br 32S |

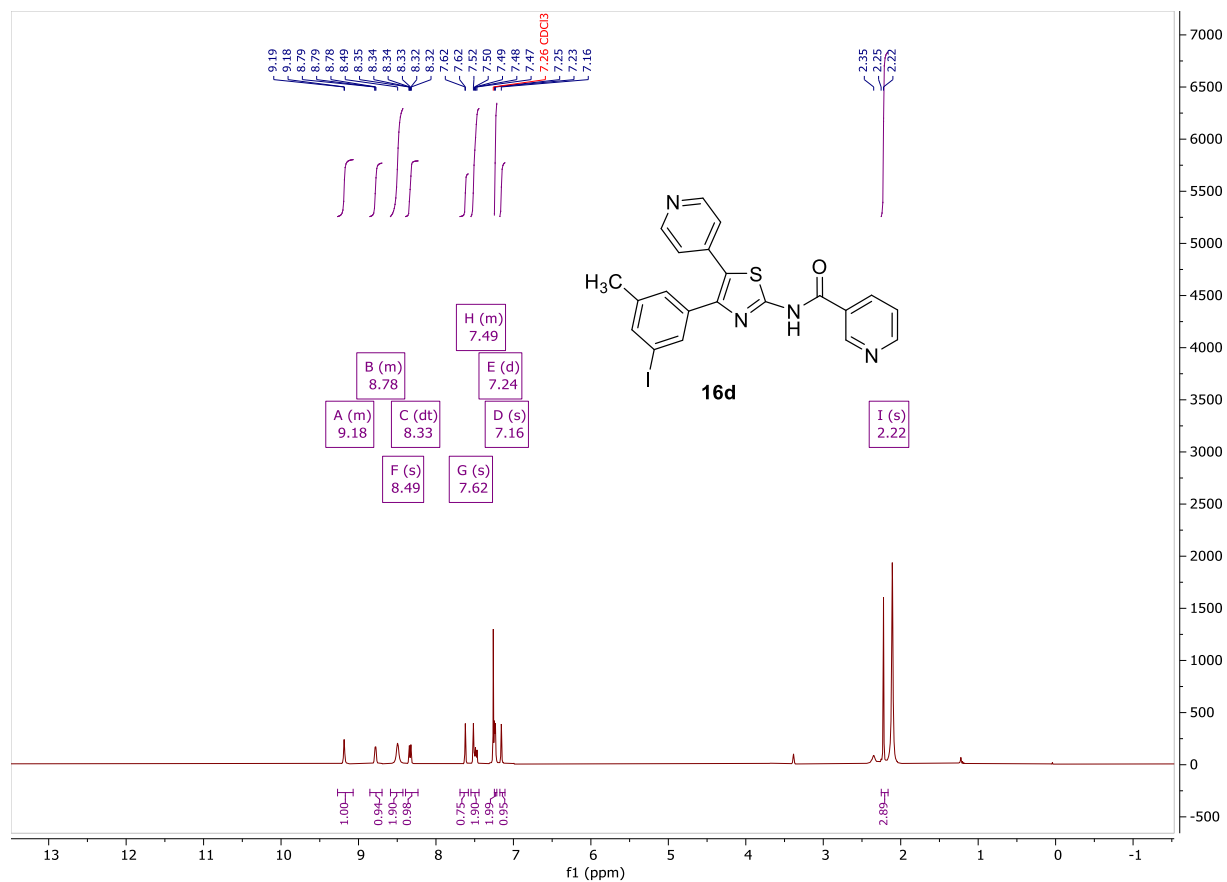

## Elemental Composition Report

Page 1

### Single Mass Analysis

Tolerance = 5.0 mDa / DBE: min = -1.5, max = 100.0

Element prediction: Off

Number of isotope peaks used for i-FIT = 3

Monoisotopic Mass, Even Electron Ions

54 formula(e) evaluated with 1 results within limits (up to 50 closest results for each mass)

Elements Used:

C: 0-100 H: 0-250 N: 4-4 O: 0-50 I: 1-1 32S: 1-1

RAM-01OCT20-415-RM-30MIN-PW 165 (2.808) AM2 (Ar,25000.0,0.00,0.00); ABS  
TOF MS ES+

7.16e+005

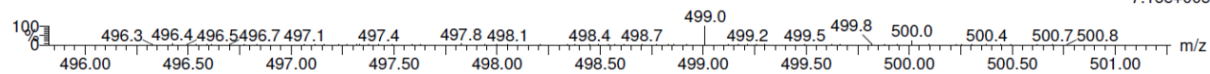

Minimum: -1.5  
Maximum: 5.0 10.0 100.0

| Mass     | Calc. Mass | mDa | PPM | DBE  | i-FIT | Norm | Conf(%) | Formula            |
|----------|------------|-----|-----|------|-------|------|---------|--------------------|
| 499.0092 | 499.0089   | 0.3 | 0.6 | 15.5 | 300.9 | n/a  | n/a     | C21 H16 N4 O I 32S |

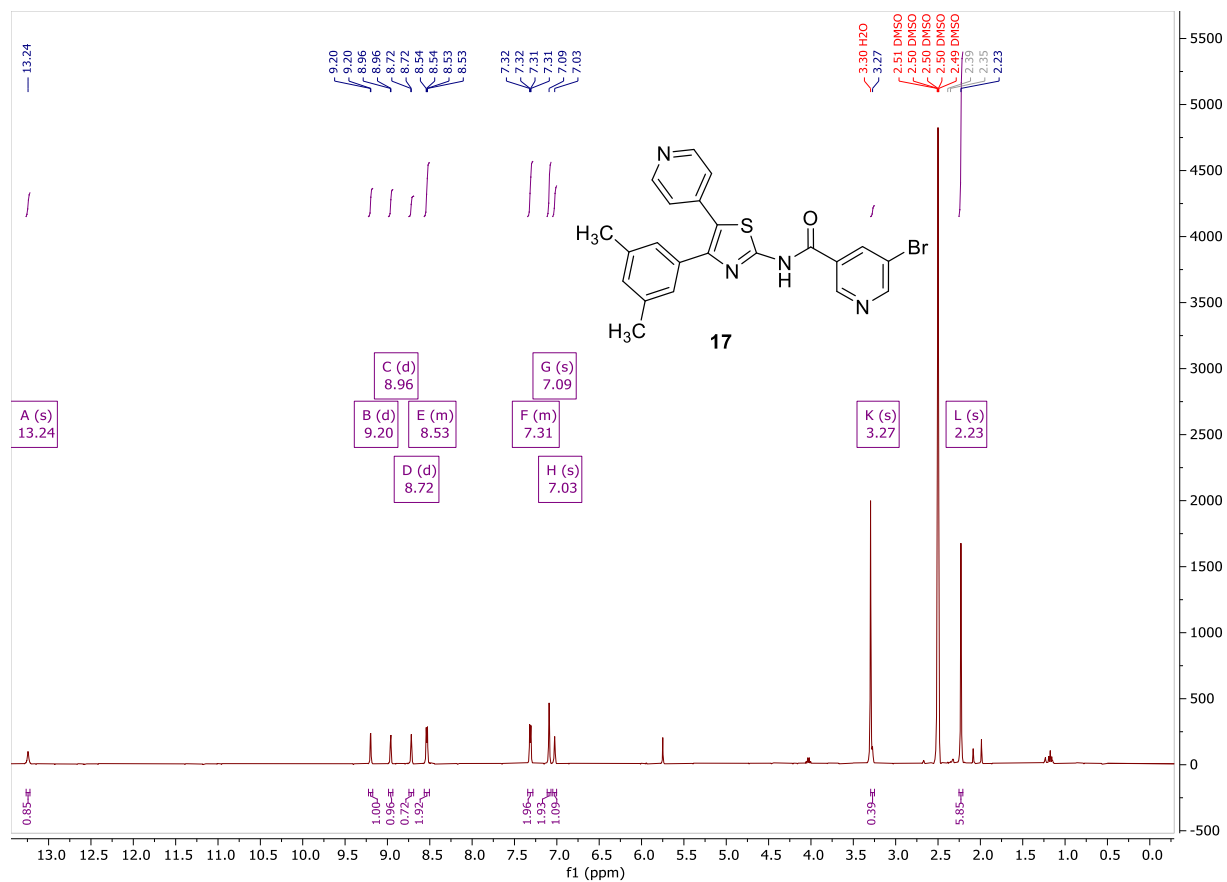

## Elemental Composition Report

Page 1

### Single Mass Analysis

Tolerance = 5.0 mDa / DBE: min = -1.5, max = 100.0

Element prediction: Off

Number of isotope peaks used for i-FIT = 3

Monoisotopic Mass, Even Electron Ions

55 formula(e) evaluated with 1 results within limits (up to 50 closest results for each mass)

Elements Used:

C: 0-100 H: 0-250 N: 4-4 O: 0-50 32S: 1-1 79Br: 1-1

RAM-25MAY21-459-RM-16H 306 (5.193) AM2 (Ar,25000.0,0.00,0.00); ABS

TOF MS ES+

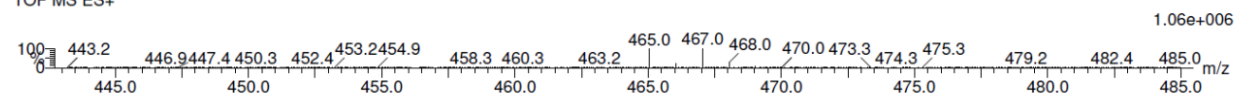

Minimum: -1.5  
Maximum: 5.0 5.0 100.0

| Mass     | Calc. Mass | mDa | PPM | DBE  | i-FIT | Norm | Conf(%) | Formula               |
|----------|------------|-----|-----|------|-------|------|---------|-----------------------|
| 465.0390 | 465.0385   | 0.5 | 1.1 | 15.5 | 540.4 | n/a  | n/a     | C22 H18 N4 O 32S 79Br |

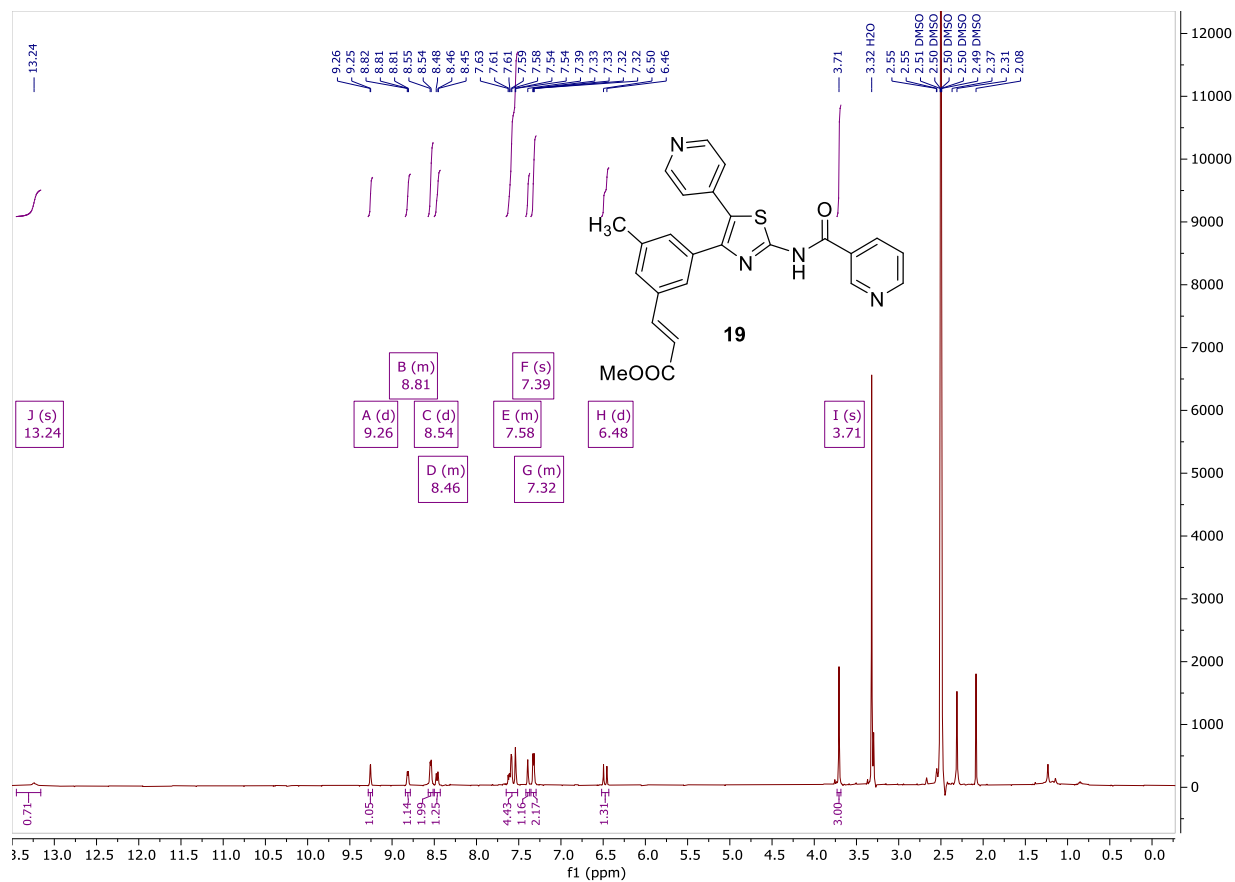

## Elemental Composition Report

Page 1

### Single Mass Analysis

Tolerance = 5.0 mDa / DBE: min = -1.5, max = 100.0

Element prediction: Off

Number of isotope peaks used for i-FIT = 3

Monoisotopic Mass, Even Electron Ions

78 formula(e) evaluated with 1 results within limits (up to 50 closest results for each mass)

Elements Used:

C: 0-100 H: 0-250 N: 4-4 O: 0-20 32S: 1-1

RAM-08SEP21-479-CC 299 (5.075) AM2 (Ar.25000.0.0.00.0.00); ABS

TOF MS ES+

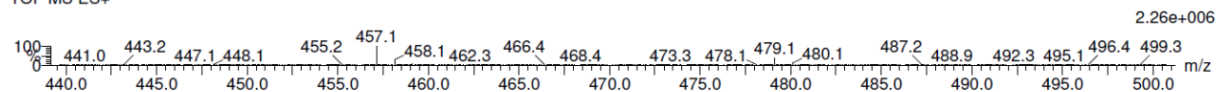

Minimum: -1.5  
Maximum: 5.0 3.0 100.0

| Mass     | Calc. Mass | mDa  | PPM  | DBE  | i-FIT | Norm | Conf(%) | Formula                                                           |
|----------|------------|------|------|------|-------|------|---------|-------------------------------------------------------------------|
| 457.1328 | 457.1334   | -0.6 | -1.3 | 17.5 | 452.7 | n/a  | n/a     | C <sub>25</sub> H <sub>21</sub> N <sub>4</sub> O <sub>3</sub> 32S |

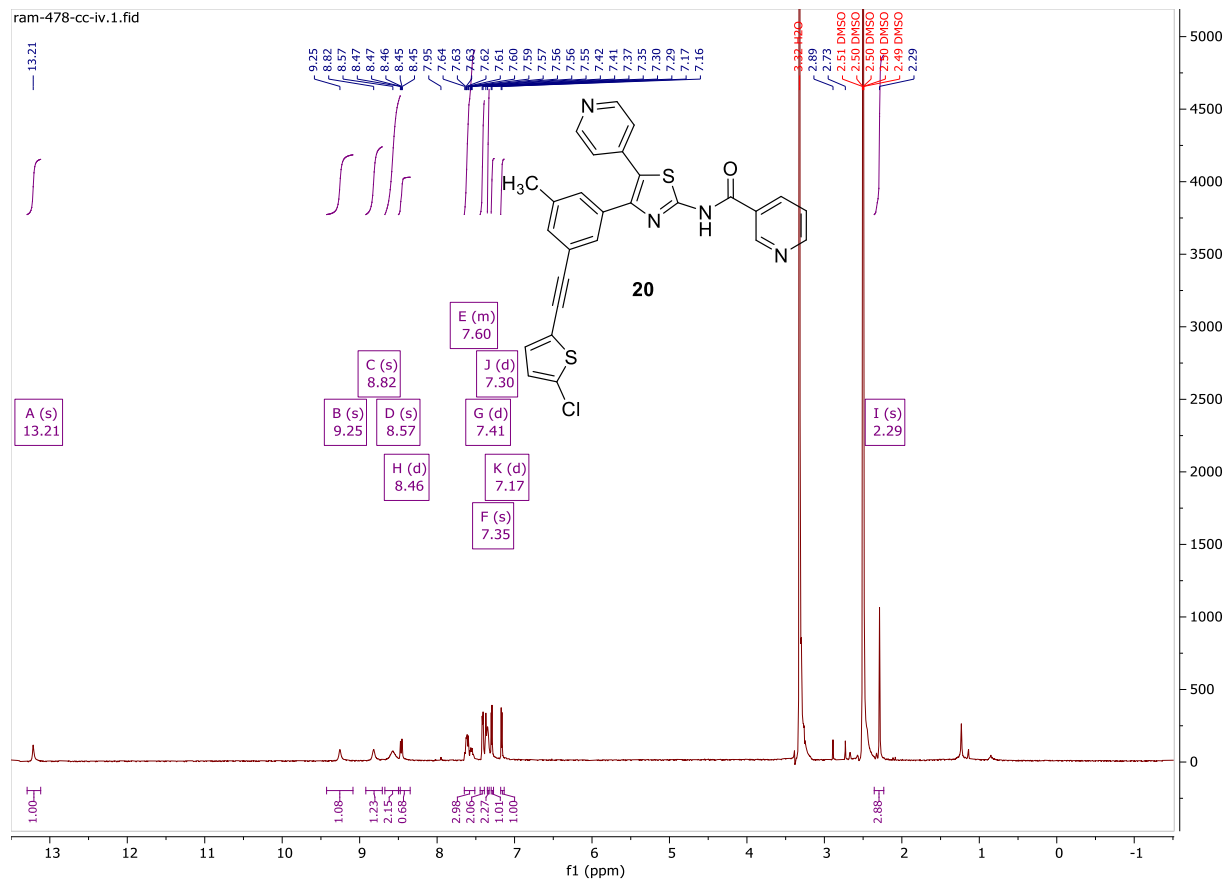

## Elemental Composition Report

Page 1

### Single Mass Analysis

Tolerance = 5.0 mDa / DBE: min = -1.5, max = 100.0

Element prediction: Off

Number of isotope peaks used for i-FIT = 3

Monoisotopic Mass, Even Electron Ions

72 formula(e) evaluated with 2 results within limits (up to 50 closest results for each mass)

Elements Used:

C: 0-100 H: 0-250 N: 4-4 O: 0-20 32S: 2-2 35Cl: 1-1

RAM-05OCT21-478-II-CC 178 (3.028) AM2 (Ar,25000.0,0.00,0.00); ABS

TOF MS ES+

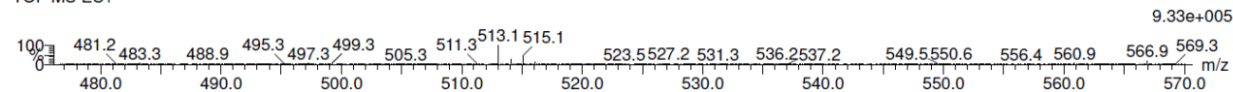

Minimum: -1.5  
Maximum: 5.0 3.0 100.0

| Mass     | Calc. Mass | mDa  | PPM  | DBE  | i-FIT | Norm  | Conf (%) | Formula                 |
|----------|------------|------|------|------|-------|-------|----------|-------------------------|
| 513.0608 | 513.0611   | -0.3 | -0.6 | 20.5 | 388.4 | 0.778 | 45.93    | C27 H18 N4 O 32S2 35Cl  |
|          | 513.0575   | 3.3  | 6.4  | -1.5 | 388.3 | 0.615 | 54.07    | C9 H26 N4 O14 32S2 35Cl |
